1 **Four chemoreceptors govern bidirectional pH taxis in *Bacillus subtilis***

2 Payman Tohidifar<sup>a</sup>, Matthew J. Plutz<sup>a</sup>, George W. Ordal<sup>b</sup>, Christopher V. Rao<sup>a#</sup>

3

4 <sup>a</sup>Department of Chemical and Biomolecular Engineering, University of Illinois at Urbana-

5 Champaign, Urbana, Illinois, USA

6 <sup>b</sup>Department of Biochemistry, University of Illinois at Urbana-Champaign, Urbana,

7 Illinois, USA

8

9

10 Running Head: pH taxis in *Bacillus subtilis*

11

12 #To whom correspondence should be addressed: Christopher V. Rao, Department of

13 Chemical and Biomolecular Engineering, University of Illinois at Urbana-Champaign,

14 Urbana, Illinois, 61801, USA. Tel: 217-244-2247; Fax: 217-333-5052; Email:

15 cvrao@illinois.edu.

16 **ABSTRACT**

17 We investigated pH taxis in *Bacillus subtilis*. This bacterium was found to perform  
18 bidirectional taxis in response to external pH gradients, enabling it to preferentially  
19 migrate to neutral environments. We next investigated the chemoreceptors involved in  
20 sensing pH gradients. We found that four chemoreceptors are involved in sensing pH:  
21 McpA and TlpA for sensing acidic environments and McpB and TlpB for alkaline ones.  
22 In addition, TlpA was found to also weakly sense alkaline environments. By analyzing  
23 chimeras between McpA and TlpB, the principal acid and base-sensing  
24 chemoreceptors, we identified four critical amino-acid residues – Thr<sup>199</sup>, Gln<sup>200</sup>, His<sup>273</sup>,  
25 and Glu<sup>274</sup> on McpA and Lys<sup>199</sup>, Glu<sup>200</sup>, Gln<sup>273</sup>, and Asp<sup>274</sup> on TlpB – involved in sensing  
26 pH. Swapping these four residues between McpA and TlpB converted the former into a  
27 base receptor and the latter into an acid receptor. Based on the results, we propose that  
28 disruption of hydrogen bonding between the adjacent residues upon pH changes  
29 induces signaling. Collectively, our results further our understanding of chemotaxis in *B.*  
30 *subtilis* and provide a new model for pH sensing in bacteria.

31

32 **IMPORTANCE**

33 Many bacteria can sense the pH in their environment and then use this information to  
34 direct their movement towards more favorable locations. In this study, we investigated  
35 the pH sensing mechanism in *Bacillus subtilis*. This bacterium preferentially migrates to  
36 neutral environments. It employs four chemoreceptors to sense pH. Two are involved in  
37 sensing acidic environments and two are involved in sensing alkaline ones. To identify  
38 the mechanism for pH sensing, we constructed receptor chimeras of acid and base  
39 sensing chemoreceptors. By analyzing the response of these chimeric receptors, we  
40 were able to identify four critical amino-acid residues involved in pH sensing and  
41 propose a model for the pH sensing mechanism in *B. subtilis*.

42

## 43 INTRODUCTION

44 *Bacillus subtilis* performs chemotaxis to a wide range of attractants and repellents  
45 (1-3). As a brief background, *B. subtilis* employs ten chemoreceptors to sense these  
46 compounds (4). The governing chemotaxis pathway functions differently than the better  
47 understood chemotaxis pathway in *Escherichia coli*. The core signaling pathways  
48 consists of a membrane-associated complex involving the chemoreceptors, CheA  
49 histidine kinase, and CheW and CheV scaffold proteins (5) that preferentially form  
50 clusters at the cell poles (6). The chemoreceptors sense attractants and repellents  
51 either by binding them directly or through binding proteins associated with their uptake  
52 (7). Attractants are known to increase the rate of CheA phosphorylation (8). The  
53 phosphate group is then transferred to CheY, which in the phosphorylated form binds to  
54 the cytoplasmic face of the flagellar motors and induces a motile response (9).

55 To sense chemical gradients, *B. subtilis* employs three adaptation systems (10-12) .  
56 The primary system involves receptor methylation. Two enzymes, the CheR  
57 methyltransferase and the CheB methylesterase, add and remove methyl groups on  
58 conserved glutamate residues located on the cytoplasmic domain of the  
59 chemoreceptors (13, 14). Depending on the specific glutamate residue, these  
60 modifications can either increase or decrease the ability of the chemoreceptors to  
61 activate the CheA kinase (5, 15). In addition, two other adaptation systems are involved  
62 in sensing gradients. One involves the scaffold protein CheV, which contains a C-  
63 terminal response regulator domain that is phosphorylated by CheA (16). Depending on  
64 the methylation state of the chemoreceptors, phosphorylated CheV can either increase  
65 or decrease chemoreceptor activity (5). The other system involves three proteins:

66 CheD, a chemoreceptor deamidase (17, 18) ; CheC, a phosphatase for phosphorylated  
67 CheY (19); and CheY. In addition to being a deamidase, CheD binds the  
68 chemoreceptors and increases their ability to activate CheA (5, 20). CheC can also bind  
69 CheD and prevent it from binding the chemoreceptors. Phosphorylated CheY increases  
70 the affinity between CheC and CheD, thus providing a feedback mechanism for  
71 controlling CheA activity in response to phosphorylated CheY (21, 22).

72 Our understanding of *B. subtilis* chemotaxis is principally limited to amino-acid  
73 chemotaxis. Aside from amino acids (7, 23), oxygen (24), and sugars transported by the  
74 phosphoenolpyruvate-dependent phosphotransferase system (25), little is known about  
75 the sensing mechanisms involved in *B. subtilis* chemotaxis. A number of reports have  
76 shown that diverse bacteria migrate in response to pH gradients. This process is best  
77 understood in *Escherichia coli*, *Salmonella enterica* and *Helicobacter pylori* (26-32). In  
78 the case of *E. coli* and *S. enterica*, these bacteria preferentially migrate to neutral (pH  
79 7.5) environments (33). The response is bidirectional, as the bacteria will migrate down  
80 pH gradients when the ambient pH is too high or migrate up pH gradients with the  
81 ambient pH is too low. The underlying mechanism involves the competitive response  
82 between two chemoreceptors, one that induces cells to migrate down pH gradients and  
83 the other that induces them to migrate up pH gradients. These two chemoreceptors  
84 respond to both internal and external pH. While the sensing mechanism is still not well  
85 understood, external pH is believed to be sensed by the extracellular domain of the  
86 chemoreceptors (27) and internal pH by the linker region between the transmembrane  
87 helices and cytoplasmic domain of the chemoreceptors (30). Swapping the entire linker

88 region or specific amino-acid residues within this linker region inverts the response of  
89 these two chemoreceptors to changes in internal pH (30).

90 In this work, we investigated chemotaxis to external pH gradients in *B. subtilis*.  
91 Similar to *E. coli* and *S. enterica*, *B. subtilis* exhibits bidirectional chemotaxis to pH  
92 gradients. To sense these pH gradients, *B. subtilis* employs four chemoreceptors, two  
93 for sensing acids and two for sensing base. By analyzing chimeras between acid and  
94 base-sensing chemoreceptors, we identified four critical amino-acid residues involved in  
95 sensing external pH. Swapping these four residues changed a base-sensing  
96 chemoreceptor into an acid-sensing one, and vice versa. Based on these data, we  
97 propose a model for pH sensing in *B. subtilis*.

98

## 99 RESULTS AND DISCUSSION

100 ***B. subtilis* exhibits bidirectional taxis to external pH gradients.** To determine  
101 whether *B. subtilis* performs chemotaxis in response to external pH gradients, we  
102 employed the capillary assay (26). Briefly, cells suspended in buffer at different pH's  
103 (6.0-8.5) were incubated with capillaries filled with buffer at pH 7.0 and then the number  
104 of cells that entered the capillaries after 1 h were counted. The resulting data show that  
105 *B. subtilis* exhibits bidirectional taxis to pH gradients in manner similar to what is  
106 observed in *E. coli* (**Figure 1A**). In particular, we found that *B. subtilis* preferentially  
107 migrates to neutral (pH 7) environments when the cells were initially suspended in either  
108 acidic or alkaline buffer (pH 6-8). Outside of this pH range, however, the cells were less  
109 motile (data not shown) and, consequently, taxis was reduced.

110  
111 **The methylation system is required for pH taxis.** *B. subtilis* employs three  
112 adaptations systems for sensing chemical gradients (11). Of the three adaptation  
113 systems, the methylation system is the dominant one for sensing amino-acid gradients.  
114 To determine whether the methylation system is also required for pH taxis, we tested  
115 whether a  $\Delta cheR\Delta cheB$  mutant was capable of pH taxis (**Figure 1B**). This mutant lacks  
116 the requisite methyltransferase (CheR) and methylesterase (CheB). It was unable to  
117 perform pH taxis, indicating that the methylation system is necessary for sensing pH  
118 gradients.

119  
120 **Four chemoreceptors are involved in sensing pH gradients.** *B. subtilis*  
121 possesses ten chemoreceptors (4). To determine which chemoreceptors are involved in

122 pH taxis, we tested mutants expressing just one chemoreceptor (**Figure 2A**). Of the  
123 single chemoreceptor mutants, only the one expressing McpA as its sole  
124 chemoreceptor was capable of acid sensing. In addition, this mutant exhibited a weak  
125 repellent response to base, with fewer cells migrating into the capillary when the buffer  
126 was at pH 6 as compared to pH 7 ( $33.7 \pm 10.5$  versus  $54.7 \pm 7.1$  cells). This repellent  
127 response is consistent with McpA being an acid sensor. Two single chemoreceptor  
128 mutants were found to exhibit base sensing: the strains expressing McpB or TlpB as  
129 their sole chemoreceptors. In particular, these strains exhibited taxis to increases in pH.  
130 They also exhibited a weak repellent response to acid (McpB:  $37.3 \pm 8.6$  versus  $51.0 \pm$   
131  $15.1$  cells; TlpB:  $44.3 \pm 2.5$  versus  $68.7 \pm 15.8$  cells). No significant responses to any  
132 changes in pH were observed for the other mutants. The existence of chemoreceptors  
133 sensing both acids and bases would explain how *B. subtilis* is capable of preferentially  
134 swimming to neutral conditions, namely that it reflects competition between the acid and  
135 base responses.

136 The genes encoding McpA, McpB, TlpA, and TlpB reside in a four-gene cluster (34).  
137 Since these four chemoreceptors exhibit high (57-65%) amino-acid sequence identify,  
138 we hypothesized that TlpA may also be involved even though a strain expressing it as  
139 the sole chemoreceptor failed to exhibit a response to changes in pH. The reason may  
140 be that TlpA is weakly expressed: the wild type expresses 2,000 copies of this  
141 chemoreceptor as compared to 16,000 copies for McpA (35). Therefore, we tested  
142 whether expressing TlpA from a stronger promoter would enable pH sensing. When *tlpA*  
143 was expressed as the sole chemoreceptor using the *mcpA* promoter, we observed both  
144 an acid and base response (**Figure 2A**, inset). The acid response, however, was



145 stronger than the base response. These results imply that TlpA alone, when over  
146 expressed, can direct *B. subtilis* to neutral environments. This begs the question as to  
147 why multiple chemoreceptors are employed for pH taxis when potentially one would  
148 suffice. Unfortunately, we cannot answer this question at this time.

149 We next tested the effect of deleting these four chemoreceptors, both individual and  
150 in combination, on pH sensing (**Figure 2B**). When *mcpA* was deleted in the wild type  
151 ( $\Delta mcpA$ ), we observed a reduction in acid sensing, consistent with this chemoreceptor  
152 being involved in chemotaxis towards lower pH's. We also observed an increase in the  
153 base response, perhaps reflecting the competition between the acid and base  
154 responses. When *tlpA* was deleted in the wild type ( $\Delta tlpA$ ), we observed no significant  
155 change in pH sensing. However, when both of the chemoreceptors were deleted in the  
156 wild type ( $\Delta mcpA\Delta tlpA$ ), the acid response was almost completely eliminated and the  
157 base response increased. These results suggest that McpA and TlpA are the primary  
158 chemoreceptors involved in sensing decreases in pH. Additional chemoreceptors may  
159 be involved; however, their contribution appears minor.

160 When either McpB or TlpB were deleted in the wild type ( $\Delta mcpB$  or  $\Delta tlpB$ ), the base  
161 response was reduced. In addition, the acid response increased. When both  
162 chemoreceptors were deleted ( $\Delta mcpB\Delta tlpB$ ), the base response was completely  
163 eliminated and the acid response further increased. These results suggest that McpB  
164 and TlpB are the sole chemoreceptors involved in sensing increases in pH.

165

166 **Identification of the regions involved in sensing pH gradients.** All four  
167 chemoreceptors involved in pH taxis employ the same double Cache domain

168 (dCache\_1) for their extracellular sensing domain (36). This would suggest that specific  
169 amino-acid residues are involved in pH. As a first step towards identifying these  
170 residues, we constructed chimeras between McpA, involved in acid sensing, and TlpB,  
171 involved in base sensing. We focused on these two chemoreceptors because they are  
172 primary ones involved in pH taxis. One challenge with constructing these chimeras is  
173 that they may not be functional. Indeed, many were not. Unfortunately, little was known  
174 prior regarding any additional ligands for these chemoreceptors. As *B. subtilis* is known  
175 to perform chemotaxis towards amino acids, we tested whether these chemoreceptors  
176 were involved in sensing casamino acids. TlpB alone was able to support chemotaxis to  
177 casamino acid; however, McpA alone did not. While we were not able to identify any  
178 attractants for McpA, we did find that McpA governs the repellent response to indole.

179 We first constructed a series of chimeras where we fused the N-terminal region of  
180 TlpB with the C-terminal region of McpA: *tlpB<sub>362</sub>mcpA*, *tlpB<sub>284</sub>mcpA*, *tlpB<sub>260</sub>mcpA*,  
181 *tlpB<sub>238</sub>mcpA* and *tlpB<sub>180</sub>mcpA* (**Figure 3**). We then tested the ability of strains  
182 expressing these hybrids as their sole chemoreceptor to sense acid and base gradients  
183 using the capillary assay. In addition, we employed casamino acids as a control. Strains  
184 expressing *tlpB<sub>362</sub>mcpA* or *tlpB<sub>284</sub>mcpA* behaved the same as wild-type *tlpB* (**Figure 4**).  
185 These results indicate that pH is not sensed by the cytoplasmic domain of the  
186 chemoreceptor or by the HAMP domain. The strain expressing *tlpB<sub>260</sub>mcpA* was able to  
187 sense both increases and decreases in pH. As the base response was similar to the  
188 strain expressing wild-type *tlpB*, these results would suggest that the region 260-284  
189 from McpA is involved in acid sensing. The strain expressing *tlpB<sub>238</sub>mcpA* was able to  
190 sense both increases and decreases in pH, albeit at reduced levels. However, the

191 strains expressing *tlpB*<sub>180</sub>*mcpA* were unable to sense base gradients and only  
192 responded to acid gradients, indicating that the region spanning the residues 180-284 is  
193 directly involved in pH sensing. In addition, strains expressing *tlpB*<sub>180</sub>*mcpA* no longer  
194 responded to casamino acids. Likely, this is due to disruption of the sensing domain. All  
195 other N-terminal TlpB chimeras were able to sense casamino-acid gradients.

196 To further characterize the region spanning residues 180-284, we replaced this  
197 region in McpA with the corresponding region from TlpB (*mcpA*<sub>180</sub>*tlpB*<sub>284</sub>*A*). Strains  
198 expressing this chimera as their sole chemoreceptor only responded to increases in pH  
199 (**Figure 4**). We then created two more chimeric strains, *mcpA*<sub>197</sub>*tlpB*<sub>284</sub>*A* and  
200 *mcpA*<sub>222</sub>*tlpB*<sub>284</sub>*A*, to narrow down the regions responsible for pH sensing. The mutant  
201 expressing *mcpA*<sub>197</sub>*tlpB*<sub>284</sub>*A* also responded only to increases in pH. However, the  
202 mutant expressing *mcpA*<sub>222</sub>*tlpB*<sub>284</sub>*A* did not exhibit a significant response to pH (**Figure**  
203 **4**). These results indicated that the sub-region spanning the residues 197-222 is also  
204 involved in base sensing.

205 All of the strains expressing the McpA chimeras exhibited a repellent response to  
206 indole. However, the response of these strains was significantly reduced as compared  
207 to the strain expressing wild-type *mcpA* (average net accumulation within capillary:  
208  $219.7 \pm 90.5$  (*mcpA*<sub>180</sub>*tlpB*<sub>284</sub>*A*),  $232.0 \pm 183.1$  (*mcpA*<sub>197</sub>*tlpB*<sub>284</sub>*A*), and  $248.6 \pm 109.5$   
209 (*mcpA*<sub>222</sub>*tlpB*<sub>284</sub>*A*) versus  $1,286.1 \pm 467.6$  cells (wild type)). This would suggest that the  
210 McpA chimeras are not fully functional, which may explain their reduced response to  
211 increases in pH as compared to TlpB.

212

213        **Identification of residues involved in pH sensing.** To identify the specific amino-  
214 acid residues involved in pH sensing, we aligned the amino-acid sequences spanning  
215 residues 195-284 on the four chemoreceptors (**Figure 5A**). Charged amino acids are  
216 more likely to be involved in pH sensing as their side-chains can be protonated and  
217 deprotonated. In addition, the polar amino acids may play an indirect role in pH sensing  
218 by impacting the local amino-acid  $pK_a$  values and/or forming hydrogen bonds with side-  
219 chains of ionizable amino-acid residues. We first focused on the charged amino acids  
220 that carried opposite signs on McpA and TlpB. Within the pH sensing sub-region  
221 spanning residues 260-284, the potential candidate residues were the Gln<sup>273</sup>-Asp<sup>274</sup> pair  
222 for TlpB and the corresponding His<sup>273</sup>-Glu<sup>274</sup> pair for McpA. Within the other pH sensing  
223 sub-region spanning residues 197-222, the potential candidate residues were the Ile<sup>218</sup>-  
224 Lys<sup>219</sup> pair for TlpB and the corresponding Glu<sup>218</sup>-Gln<sup>219</sup> pair for McpA.

225        The pH sensing sub-regions are separated by 38 amino-acid residues. However,  
226 when the predicted tertiary structure of TlpB sensing domain was visualized, we found  
227 the amino-acid pair Lys<sup>199</sup>-Glu<sup>200</sup> was in close proximity to the Gln<sup>273</sup>-Asp<sup>274</sup> pair (**Figure**  
228 **5B**). Similarly, we observed the mutual Thr<sup>199</sup>-Gln<sup>200</sup> pair was in close proximity to the  
229 His<sup>273</sup>-Glu<sup>274</sup> pair on McpA (not shown in Figure). Therefore, Lys<sup>199</sup>-Glu<sup>200</sup> on TlpB and  
230 Thr<sup>199</sup>-Gln<sup>200</sup> on McpA were also potential candidate residues for mutational analysis as  
231 local amino-acid interactions could affect pH sensing.

232        We examined the role of these candidate pairs by swapping them with their  
233 counterparts on the opposite receptor, both individually and in combination. We first  
234 replaced Gln<sup>273</sup>-Asp<sup>274</sup> pair on TlpB with the counterpart His<sup>273</sup>-Glu<sup>274</sup> pair from McpA.  
235 Cells expressing *tlpB-Q273H/D274E* as their sole chemoreceptor exhibited a reduced

236 base response and an increased acid response (**Figure 5C**). When we performed the  
237 reciprocal experiment, replacing the His<sup>273</sup>-Glu<sup>274</sup> pair on McpA with the Gln<sup>273</sup>-Asp<sup>274</sup>  
238 pair from TlpB, we observed a large decrease in the acid response and small increase  
239 in the base response (**Figure 5D**). These results demonstrate that Gln<sup>273</sup>-Asp<sup>274</sup> on  
240 TlpB and His<sup>273</sup>-Glu<sup>274</sup> on McpA are involved in pH sensing.

241 We next tested the effect of replacing the Lys<sup>199</sup>-Glu<sup>200</sup> pair on TlpB with the Thr<sup>199</sup>-  
242 Gln<sup>200</sup> pair from McpA. This mutant (*tlpB-K199T/E200Q*) exhibited a weak response to  
243 both acids and bases (**Figure 5C**). However, the reciprocal mutation (*mcpA-  
244 T199K/Q200E*), where we replaced the Thr<sup>199</sup>-Gln<sup>200</sup> pair on McpA with the Lys<sup>199</sup>-  
245 Glu<sup>200</sup> pair from TlpB, led to a small reduction in the acid response and a small increase  
246 in the base response (**Figure 5D**). When the four residues on TlpB were swapped with  
247 their counterpart residues for McpA, the base response was eliminated and the resulting  
248 strain only exhibited an acid response, albeit at reduced levels (**Figure 5C**). Similarly,  
249 when the four residues on McpA were swapped with their counterpart residues from  
250 TlpB, the acid response was significantly reduced and the resulting strain exhibited a  
251 base response, again at reduced levels. Collectively, these results imply that these four  
252 amino-acid residues are sufficient to define the polarity of pH sensing for both McpA  
253 and TlpB. Therefore, we did not examine Ile<sup>218</sup>-Lys<sup>219</sup> pair on TlpB or Glu<sup>218</sup>-Gln<sup>219</sup> on  
254 McpA as these residues are located far away from the identified key residues (**Figure  
255 5B**) and likely are not involved in pH sensing.

256 We note that these mutant chemoreceptors with swapped polarity exhibited a  
257 reduced response to pH. Likely, the mutations are disrupting overall chemoreceptor

258 function. When we tested the chemoreceptors against casamino acids and indole, they  
259 exhibited a weaker response than the wild type.

260

261 **Model for pH sensing.** The experiments described above identified four critical  
262 amino-acid residues involved in pH sensing. The predicted structures for the  
263 extracellular domains of TlpB and McpA reveal that these four amino-acid residues are  
264 in close proximity of one another, suggesting that direct interactions between them may  
265 govern the sensing mechanism (see **Fig. 5B**). Side-chains of ionizable amino-acid  
266 residues can accept or donate protons as the local pH varies. It is generally thought that  
267 changes in protonation state of ionizable amino-acid residues can lead to  
268 conformational changes in the protein and possibly alter its activity. These  
269 conformational changes are typically induced by the formation or disruption of hydrogen  
270 bonds between two or more proximal residues. The protonation state of ionizable  
271 amino-acid residues largely relies on their local  $pK_a$  values. The local  $pK_a$  of an amino-  
272 acid residue in the folded protein depends on its interactions with neighbor residues. As  
273 the result of such interactions – including charge-dipole, charge-charge, and ion-pairs –  
274  $pK_a$  values can be significantly different from the intrinsic  $pK_a$  ( $pK_{a-int}$ ) values measured  
275 in blocked pentapeptides (37). For example, the  $pK_a$  of a lysine residue can be as low  
276 as 5.7 and the  $pK_a$  of an aspartate residue can be as high as 9.2 in folded proteins (37).

277 In the case of TlpB, increase in pH can directly affect three ionizable residues:  
278 Asp<sup>274</sup>, Lys<sup>199</sup>, and Glu<sup>200</sup>. The point mutation *tlpB-D274N* did not affect the responses  
279 to pH ( $1,334.7 \pm 352.4$  versus  $1,037.2 \pm 76.9$  cell for wild-type *tlpB*), suggesting that the  
280 protonation state of Asp<sup>274</sup> remains intact or does not affect interactions with other

281 residues. However, the double mutant K199T/E200Q significantly reduced the response  
282 to increase in pH (**Figure 5C**). This result implies increases in pH affects the protonation  
283 state of Lys<sup>199</sup> or/and Glu<sup>200</sup>. Based on these results, we offer one potential model to  
284 explain the response of TlpB to increases in pH (**Figure 6**). At lower pH (e.g. pH=6),  
285 Lys<sup>199</sup> and/or Glu<sup>200</sup> are protonated and form stable hydrogen bonds with Gln<sup>273</sup> or/and  
286 Asp<sup>274</sup>. As pH increases, Lys<sup>199</sup> and/or Glu<sup>200</sup> likely become deprotonated, and the loss  
287 of the hydrogen bonds destabilizes the local structure of lower region of the sensing  
288 domain and the proximal transmembrane helix (TM2, **Fig. 3**). This structural transition is  
289 then propagated through TM2 to the HAMP domain and subsequently to distal  
290 cytoplasmic signaling, thus inducing the autophosphorylation of CheA histidine kinase  
291 (**Figure 6A**).

292 In the case of McpA, the ionizable residues are His<sup>273</sup> and Glu<sup>274</sup>. The other two key  
293 residues Thr<sup>199</sup> and Gln<sup>200</sup> contain polar side-chains that are insensitive to pH changes.  
294 As expected, the double mutant H273Q/E274D significantly reduced the response to  
295 decrease in pH (**Figure 5D**). Among the two residues, His<sup>273</sup> seems to play a pivotal  
296 role as the point mutation E274Q did not affect the response to pH gradients ( $1,176.0 \pm$   
297  $124.5$  versus  $910.4 \pm 77.0$  cells for wild-type *tlpB*). One possible model is that at high pH  
298 (e.g. pH=8), His<sup>273</sup> is in its neutral form. As pH decreases, His<sup>273</sup> becomes protonated  
299 and no longer forms hydrogen bonds with either Thr<sup>199</sup> and/or Gln<sup>200</sup>. This destabilizes  
300 the local structure. Similar to the TlpB case, this conformational change induces a  
301 structural transition in signaling module, which in turn promotes phosphorylation of the  
302 CheA histidine kinase (**Figure 6B**).

303

304 **CONCLUSION**

305 We identified the chemoreceptors governing pH taxis in *B. subtilis*. McpA is the  
306 primary acid chemoreceptor while McpB and TlpB are the base chemoreceptors. In  
307 addition, TlpA alone functions both as an acid and base chemoreceptor, though its  
308 primary role appears to be acid sensing. Using receptor chimeras, we identified four  
309 critical amino-acid residues involved in pH sensing. Swapping these residues between  
310 McpA and TlpB was able to convert the former into a base sensor and the latter into an  
311 acid sensor. Based on our results, we were able to propose a model for pH sensing in  
312 *B. subtilis*. Collectively, these results further our understanding of pH taxis and provide a  
313 model for pH sensing.

314



## 315 MATERIALS AND METHODS

316 **Chemicals and growth media.** The following media were used for cell growth:  
317 tryptone broth (TB: 1% tryptone and 0.5% NaCl); tryptose blood agar base (TBAB: 1%  
318 tryptone, 0.3% beef extract, 0.5% NaCl, and 1.5% agar); and capillary assay minimal  
319 medium (CAMM: 50 mM potassium phosphate buffer (pH 7.0), 1.2 mM MgCl<sub>2</sub>, 0.14 mM  
320 CaCl<sub>2</sub>, 1 mM (NH<sub>4</sub>)<sub>2</sub>SO<sub>4</sub>, 0.01 mM MnCl<sub>2</sub>, and 4.2 μM ferric citrate). Chemotaxis buffer  
321 consists of 10 mM potassium phosphate buffer (pH 7.0), 0.14 mM CaCl<sub>2</sub>, 0.3 mM  
322 (NH<sub>4</sub>)<sub>2</sub>SO<sub>2</sub>, 0.1 mM EDTA, 5 mM sodium lactate, and 0.05% (v/v) glycerol.

323  
324 **Bacterial strains and plasmids.** All *B. subtilis* strains were derived from the strain  
325 OI1085 (38). All cloning was performed using NEB® 5-alpha Competent *E. coli* (New  
326 England Biolabs). Bacterial strains and plasmids used in this work are listed in **Tables 1**  
327 and **2**, respectively. All oligonucleotides used in this study are provided in **Table S1**.

328 Gene deletions were constructed using plasmids derived from pJSpe. pJSpe was  
329 derived from pJOE8999, which provides a CRISPR/Cas9-based, marker-free genome  
330 editing system for *B. subtilis* (39). We found that the *SfiI* restriction sites on the original  
331 pJOE8999 were inefficient for subcloning homology templates. In addition, a 13-bp long  
332 DNA scar remained on the chromosome after the targeted DNA fragment was deleted  
333 using pJOE8999-derived vectors. Therefore, we created pJSpe for more efficient  
334 assembly of homology templates based on Gibson assembly and scar-less deletion of  
335 DNA fragments. Briefly, a 50-bp annealed complementary DNA oligonucleotides  
336 containing a *SpeI* restriction site and optimized for Gibson assembly was inserted  
337 between the *SfiI* restriction sites on pJOE8999 to yield pJSpe. For construction of the

338 knockout plasmids, a 20-bp sgRNA target sequence for the targeted gene was  
339 designed using CRISPy-web online tool (40). Annealed complementary oligonucleotides  
340 were then subcloned into *BsaI* restriction sites on pJSpe as described in (39). Two PCR  
341 fragments (~600-800 bp) flanking the targeted gene using overlapping primers were  
342 subcloned into *SpeI*-linearized vector using Gibson assembly (41). The resultant vector  
343 was then linearized using *XhoI* and ligated with T4 DNA ligase to create a long DNA  
344 concatemer. The concatemer was then transformed into *B. subtilis* strain using the two-  
345 step Spizizen method (42). Single colonies were isolated and twice streaked on fresh  
346 plates. Plasmid curing and genotype verification were performed as previously  
347 described (39).

348 Strains expressing a single wild-type chemoreceptor were constructed by integrating  
349 the respective chemoreceptor expression cassette into the *amyE* locus. The region  
350 containing the promoter, gene, and terminator was PCR amplified from genomic DNA  
351 isolated from *B. subtilis* 168. The PCR fragment was then cloned into the plasmid  
352 pAIN750 using the *EcoRI* and *BamHI* restriction sites. The plasmid was then  
353 transformed in OI3545, which lacks all ten chemoreceptors, as described above.

354 Chemoreceptor chimeras were constructed using Gibson assembly (41). Briefly, two  
355 opposing primers were designed to prime DNA synthesis outwards from the fusion point  
356 of the chimeric gene using PCR with pAIN750*mcpA* as the DNA template. Then, a  
357 second pair of primers with overlapping regions were designed to PCR-amplify the  
358 desired fragment of *tlpB* gene from pAIN750*tlpB* plasmid. Following purification the PCR  
359 products by gel extraction, the DNA fragments were assembled (41).

360 Point mutations were introduced into chemoreceptor genes using the inverse PCR  
361 method with pAIN750*mcpA* and pAIN750*tlpB* as DNA templates. Briefly, plasmid was  
362 PCR amplified using two opposing primers containing the desired mutations. Following  
363 purification by gel extraction, the DNA fragment was phosphorylated with T4  
364 polynucleotide kinase and then blunt-end ligated using T4 DNA ligase. Ligation product  
365 was heat-inactivated and transformed into *E. coli*. The plasmid was then isolated from  
366 *E. coli* and transformed into *B. subtilis* OI3545 as described above.

367  
368 **Capillary assay for chemotaxis.** The capillary assay was performed as described  
369 previously (1, 26). Briefly, cells were grown for 16 hours at 30 °C on TBAB plates. The  
370 cells were then scraped from the plates and resuspended to  $A_{600} = 0.03$  in 5-mL CAMM  
371 supplemented with 50 µg/mL histidine, methionine, tryptophan and 20 mM sorbitol, and  
372 2% TB. The cultures were grown to  $A_{600} = 0.4-0.45$  at 37 °C and 250 rpm shaking. At  
373 this point, 50 µl of GL solution (5% (v/v) glycerol, 0.5 M sodium lactate) was added to  
374 culture and the cells were incubated for another 15 minutes (at 37 °C, 250 rpm  
375 shaking). Cells were then washed twice with chemotaxis buffer (pH 7.0) and incubated  
376 for additional 25 minutes (at 37 °C, 250 rpm shaking) to assure that the cells were  
377 motile. Cells were diluted to  $A_{600} = 0.001$  in chemotaxis buffer at desired pH values for  
378 pH taxis experiments and in chemotaxis buffer (pH 7.0) for casamino-acid control  
379 experiments. For indole control experiments, cells were diluted to  $A_{600} = 0.005$  in  
380 chemotaxis buffer containing indole (50 µM, pH 7.0). Prior to assay, cells were briefly  
381 incubated in chemotaxis buffer at room temperature (shaking slowly) and then aliquoted  
382 into 0.3-mL ponds on a slide warmer at 37 °C and closed-end capillary tubes filled with

383 chemotaxis buffer or casamino acid ( $3.16 \times 10^{-5}$  g/mL) solutions prepared with  
384 chemotaxis buffer (pH 7.0) were inserted. After a fixed time (30 minutes for casamino  
385 acids and 1 hour for pH and indole), cells that migrated into the capillaries were  
386 harvested and transferred to 3 mL of top agar (1% tryptone, 0.8% NaCl, 0.8% agar, 0.5  
387 mM EDTA) and plated onto TB (1.5% agar) plates. These plates were incubated at 37  
388 °C for 16 hours and colonies were counted. Experiments were performed in triplicate  
389 each day and then repeated on three different days.

390

391 **Structural analysis.** Domain predictions were performed using the phmmer search  
392 engine on the HMMER web-server using the UniProt reference proteomes database  
393 with default sequence E-values thresholds (43). Boundaries of both transmembrane  
394 alpha helices were first predicted using TMHMM web-server v.2.0 (44) and then  
395 manually adjusted using information from propensity analysis of amino acid distributions  
396 around lipid/water interfaces (45). Pairwise amino-acid sequence alignments between  
397 McpA and TlpB for chimeric-receptor analysis were performed using EMBOSS Water  
398 (46) and multiple sequence alignment between McpA, McpB, TlpA, and TlpB for  
399 mutational analysis were carried out in T-Coffee (47). Structures for the McpA and TlpB  
400 sensing domains (residues 38-278) were predicted using the I-TASSER web-server  
401 (48). The C-scores were 1.15 and 1.13 for McpA and TlpB, respectively. Both models  
402 are structurally close to the ligand-binding domain of the PctA chemoreceptor from  
403 *Pseudomonas aeruginosa PAO1* (PDB: 5LTX) with TM-score of 0.955 for both McpA  
404 and TlpB. Visualization of all structures was accomplished using the VMD software  
405 package (v-1.9.3) (49).



407 **ACKNOWLEDGEMENTS**

408       This work was supported by the University of Illinois through the Robert W. Schaefer  
409 Faculty Scholar fund and National Institutes of Health Grant GM054365.

410

411

412 **REFERENCES**

- 413 1. Ordal GW, Gibson KJ. 1977. Chemotaxis toward amino acids by *Bacillus subtilis*.  
414 J Bacteriol 129:151-5.
- 415 2. Ordal GW, Villani DP, Rosendahl MS. 1979. Chemotaxis towards sugars by  
416 *Bacillus subtilis*. J Gen Microbiol 115:167-72.
- 417 3. Ordal GW, Goldman DJ. 1976. Chemotactic repellents of *Bacillus subtilis*. J Mol  
418 Biol 100:103-8.
- 419 4. Zimmer MA, Szurmant H, Saulmon MM, Collins MA, Bant JS, Ordal GW. 2002.  
420 The role of heterologous receptors in McpB-mediated signalling in *Bacillus*  
421 *subtilis* chemotaxis. Mol Microbiol 45:555-68.
- 422 5. Walukiewicz HE, Tohidifar P, Ordal GW, Rao CV. 2014. Interactions among the  
423 three adaptation systems of *Bacillus subtilis* chemotaxis as revealed by an in  
424 vitro receptor-kinase assay. Mol Microbiol 93:1104-18.
- 425 6. Wu K, Walukiewicz HE, Glekas GD, Ordal GW, Rao CV. 2011. Attractant binding  
426 induces distinct structural changes to the polar and lateral signaling clusters in  
427 *Bacillus subtilis* chemotaxis. J Biol Chem 286:2587-95.
- 428 7. Glekas GD, Mulhern BJ, Kroc A, Duelfer KA, Lei V, Rao CV, Ordal GW. 2012.  
429 The *Bacillus subtilis* chemoreceptor McpC senses multiple ligands using two  
430 discrete mechanisms. J Biol Chem 287:39412-8.
- 431 8. Garrity LF, Ordal GW. 1997. Activation of the CheA kinase by asparagine in  
432 *Bacillus subtilis* chemotaxis. Microbiology 143:2945-51.

- 433 9. Bischoff DS, Ordal GW. 1991. Sequence and characterization of *Bacillus subtilis*  
434 CheB, a homolog of *Escherichia coli* CheY, and its role in a different mechanism  
435 of chemotaxis. *J Biol Chem* 266:12301-5.
- 436 10. Rao CV, Kirby JR, Arkin AP. 2004. Design and diversity in bacterial chemotaxis:  
437 a comparative study in *Escherichia coli* and *Bacillus subtilis*. *PLoS Biol* 2:E49.
- 438 11. Rao CV, Glekas GD, Ordal GW. 2008. The three adaptation systems of *Bacillus*  
439 *subtilis* chemotaxis. *Trends Microbiol* 16:480-7.
- 440 12. Rao CV, Ordal GW. 2009. The molecular basis of excitation and adaptation  
441 during chemotactic sensory transduction in bacteria. *Contrib Microbiol* 16:33-64.
- 442 13. Kirsch ML, Zuberi AR, Henner D, Peters PD, Yazdi MA, Ordal GW. 1993.  
443 Chemotactic methyltransferase promotes adaptation to repellents in *Bacillus*  
444 *subtilis*. *J Biol Chem* 268:25350-6.
- 445 14. Kirsch ML, Peters PD, Hanlon DW, Kirby JR, Ordal GW. 1993. Chemotactic  
446 methylesterase promotes adaptation to high concentrations of attractant in  
447 *Bacillus subtilis*. *J Biol Chem* 268:18610-6.
- 448 15. Glekas GD, Cates JR, Cohen TM, Rao CV, Ordal GW. 2011. Site-specific  
449 methylation in *Bacillus subtilis* chemotaxis: effect of covalent modifications to the  
450 chemotaxis receptor McpB. *Microbiology* 157:56-65.
- 451 16. Karatan E, Saulmon MM, Bunn MW, Ordal GW. 2001. Phosphorylation of the  
452 response regulator CheV is required for adaptation to attractants during *Bacillus*  
453 *subtilis* chemotaxis. *J Biol Chem* 276:43618-26.
- 454 17. Kristich CJ, Ordal GW. 2002. *Bacillus subtilis* CheD is a chemoreceptor  
455 modification enzyme required for chemotaxis. *J Biol Chem* 277:25356-62.



- 456 18. Chao X, Muff TJ, Park SY, Zhang S, Pollard AM, Ordal GW, Bilwes AM, Crane  
457 BR. 2006. A receptor-modifying deamidase in complex with a signaling  
458 phosphatase reveals reciprocal regulation. *Cell* 124:561-71.
- 459 19. Szurmant H, Muff TJ, Ordal GW. 2004. *Bacillus subtilis* CheC and FliY are  
460 members of a novel class of CheY-P-hydrolyzing proteins in the chemotactic  
461 signal transduction cascade. *J Biol Chem* 279:21787-92.
- 462 20. Glekas GD, Plutz MJ, Walukiewicz HE, Allen GM, Rao CV, Ordal GW. 2012.  
463 Elucidation of the multiple roles of CheD in *Bacillus subtilis* chemotaxis. *Mol*  
464 *Microbiol* 86:743-56.
- 465 21. Muff TJ, Ordal GW. 2007. The CheC phosphatase regulates chemotactic  
466 adaptation through CheD. *J Biol Chem* 282:34120-8.
- 467 22. Yuan W, Glekas GD, Allen GM, Walukiewicz HE, Rao CV, Ordal GW. 2012. The  
468 importance of the interaction of CheD with CheC and the chemoreceptors  
469 compared to its enzymatic activity during chemotaxis in *Bacillus subtilis*. *PLoS*  
470 *One* 7:e50689.
- 471 23. Glekas GD, Foster RM, Cates JR, Estrella JA, Wawrzyniak MJ, Rao CV, Ordal  
472 GW. 2010. A PAS domain binds asparagine in the chemotaxis receptor McpB in  
473 *Bacillus subtilis*. *J Biol Chem* 285:1870-8.
- 474 24. Hou S, Larsen RW, Boudko D, Riley CW, Karatan E, Zimmer M, Ordal GW, Alam  
475 M. 2000. Myoglobin-like aerotaxis transducers in Archaea and Bacteria. *Nature*  
476 403:540-4.

- 477 25. Kristich CJ, Glekas GD, Ordal GW. 2003. The conserved cytoplasmic module of  
478 the transmembrane chemoreceptor McpC mediates carbohydrate chemotaxis in  
479 *Bacillus subtilis*. Mol Microbiol 47:1353-66.
- 480 26. Tso WW, Adler J. 1974. Negative chemotaxis in *Escherichia coli*. J Bacteriol  
481 118:560-76.
- 482 27. Krikos A, Conley MP, Boyd A, Berg HC, Simon MI. 1985. Chimeric  
483 chemosensory transducers of *Escherichia coli*. Proc Natl Acad Sci U S A  
484 82:1326-30.
- 485 28. Kihara M, Macnab RM. 1981. Cytoplasmic pH mediates pH taxis and weak-acid  
486 repellent taxis of bacteria. J Bacteriol 145:1209-21.
- 487 29. Repaske DR, Adler J. 1981. Change in intracellular pH of *Escherichia coli*  
488 mediates the chemotactic response to certain attractants and repellents. J  
489 Bacteriol 145:1196-208.
- 490 30. Umemura T, Matsumoto Y, Ohnishi K, Homma M, Kawagishi I. 2002. Sensing of  
491 cytoplasmic pH by bacterial chemoreceptors involves the linker region that  
492 connects the membrane-spanning and the signal-modulating helices. J Biol  
493 Chem 277:1593-8.
- 494 31. Croxen MA, Sisson G, Melano R, Hoffman PS. 2006. The *Helicobacter pylori*  
495 chemotaxis receptor TlpB (HP0103) is required for pH taxis and for colonization  
496 of the gastric mucosa. J Bacteriol 188:2656-65.
- 497 32. Goers Sweeney E, Henderson JN, Goers J, Wreden C, Hicks KG, Foster JK,  
498 Parthasarathy R, Remington SJ, Guillemin K. 2012. Structure and proposed

- 499 mechanism for the pH-sensing *Helicobacter pylori* chemoreceptor TlpB. Structure  
500 20:1177-88.
- 501 33. Yang Y, Sourjik V. 2012. Opposite responses by different chemoreceptors set a  
502 tunable preference point in *Escherichia coli* pH taxis. Mol Microbiol 86:1482-9.
- 503 34. Hanlon DW, Ordal GW. 1994. Cloning and characterization of genes encoding  
504 methyl-accepting chemotaxis proteins in *Bacillus subtilis*. J Biol Chem  
505 269:14038-46.
- 506 35. Cannistraro VJ, Glekas GD, Rao CV, Ordal GW. 2011. Cellular stoichiometry of  
507 the chemotaxis proteins in *Bacillus subtilis*. J Bacteriol 193:3220-7.
- 508 36. Upadhyay AA, Fleetwood AD, Adebali O, Finn RD, Zhulin IB. 2016. Cache  
509 Domains That are Homologous to, but Different from PAS Domains Comprise the  
510 Largest Superfamily of Extracellular Sensors in Prokaryotes. PLoS Comput Biol  
511 12:e1004862.
- 512 37. Pace CN, Grimsley GR, Scholtz JM. 2009. Protein ionizable groups: pK values  
513 and their contribution to protein stability and solubility. J Biol Chem 284:13285-9.
- 514 38. Ullah AH, Ordal GW. 1981. In vivo and in vitro chemotactic methylation in  
515 *Bacillus subtilis*. J Bacteriol 145:958-65.
- 516 39. Altenbuchner J. 2016. Editing of the *Bacillus subtilis* Genome by the CRISPR-  
517 Cas9 System. Appl Environ Microbiol 82:5421-7.
- 518 40. Blin K, Pedersen LE, Weber T, Lee SY. 2016. CRISPy-web: An online resource  
519 to design sgRNAs for CRISPR applications. Synth Syst Biotechnol 1:118-121.

- 520 41. Gibson DG, Young L, Chuang RY, Venter JC, Hutchison CA, 3rd, Smith HO.  
521 2009. Enzymatic assembly of DNA molecules up to several hundred kilobases.  
522 Nat Methods 6:343-5.
- 523 42. Anagnostopoulos C, Spizizen J. 1961. Requirements for Transformation in  
524 *Bacillus Subtilis*. J Bacteriol 81:741-6.
- 525 43. Potter SC, Luciani A, Eddy SR, Park Y, Lopez R, Finn RD. 2018. HMMER web  
526 server: 2018 update. Nucleic Acids Res 46:W200-W204.
- 527 44. Sonnhammer EL, von Heijne G, Krogh A. 1998. A hidden Markov model for  
528 predicting transmembrane helices in protein sequences. Proc Int Conf Intell Syst  
529 Mol Biol 6:175-82.
- 530 45. Ulmschneider MB, Sansom MS. 2001. Amino acid distributions in integral  
531 membrane protein structures. Biochim Biophys Acta 1512:1-14.
- 532 46. Chojnacki S, Cowley A, Lee J, Foix A, Lopez R. 2017. Programmatic access to  
533 bioinformatics tools from EMBL-EBI update: 2017. Nucleic Acids Res 45:W550-  
534 W553.
- 535 47. Notredame C, Higgins DG, Heringa J. 2000. T-Coffee: A novel method for fast  
536 and accurate multiple sequence alignment. J Mol Biol 302:205-17.
- 537 48. Zhang Y. 2008. I-TASSER server for protein 3D structure prediction. BMC  
538 Bioinformatics 9:40.
- 539 49. Humphrey W, Dalke A, Schulten K. 1996. VMD: visual molecular dynamics. J  
540 Mol Graph 14:33-8, 27-8.

541

542

543

**Table 1.** Strains used in this study

| Strain  | Relevant genotype or description                                | Reference           |
|---------|-----------------------------------------------------------------|---------------------|
| 5-alpha | <i>E. coli</i> cloning host                                     | New England Biolabs |
| OI3269  | <i>Bacillus subtilis</i> 168, <i>trpC2</i>                      |                     |
| OI1085  | <i>trpF7 hisH2 metC che<sup>+</sup></i>                         | (38)                |
| OI3017  | <i>cheB/ cheR::cat</i>                                          | (13)                |
| PTS324  | $\Delta mcpA$                                                   | This work           |
| PTS325  | $\Delta tlpA$                                                   | This work           |
| PTS185  | $\Delta mcpB$                                                   | This work           |
| PTS186  | $\Delta tlpB$                                                   | This work           |
| PTS334  | $\Delta mcpA \Delta tlpA$                                       | This work           |
| PTS187  | $\Delta tlpB \Delta mcpB$                                       | This work           |
| OI3545  | $\Delta 10mcp che^+$                                            | (24)                |
| OI3921  | OI3545 <i>amyE5720::mcpA</i>                                    | (17)                |
| OI3605  | OI3545 <i>amyE5720::mcpB</i>                                    | (25)                |
| OI3974  | OI3545 <i>amyE5720::mcpC</i>                                    | (17)                |
| OI4474  | OI3545 <i>amyE5720::tlpA</i>                                    | This work           |
| OI4475  | OI3545 <i>amyE5720::tlpB</i>                                    | This work           |
| OI4483  | OI3545 <i>amyE5720::tlpC</i>                                    | This work           |
| OI4476  | OI3545 <i>amyE5720::yfmS</i>                                    | This work           |
| OI4477  | OI3545 <i>amyE5720::yvaQ</i>                                    | This work           |
| OI4482  | OI3545 <i>amyE5720::hemAT</i>                                   | This work           |
| OI4479  | OI3545 <i>amyE5720::yoaH</i>                                    | This work           |
| PTS163  | OI3545 <i>amyE5720::tlpB<sub>284</sub>mcpA</i>                  | This work           |
| PTS165  | OI3545 <i>amyE5720::tlpB<sub>362</sub>mcpA</i>                  | This work           |
| PTS368  | OI3545 <i>amyE5720::tlpB<sub>261</sub>mcpA</i>                  | This work           |
| PTS493  | OI3545 <i>amyE5720::tlpB<sub>238</sub>mcpA</i>                  | This work           |
| PTS505  | OI3545 <i>amyE5720::tlpB<sub>180</sub>mcpA</i>                  | This work           |
| PTS500  | OI3545 <i>amyE5720::mcpA<sub>180</sub> tlpB<sub>284</sub> A</i> | This work           |
| PTS507  | OI3545 <i>amyE5720::mcpA<sub>197</sub> tlpB<sub>284</sub> A</i> | This work           |
| PTS509  | OI3545 <i>amyE5720::mcpA<sub>222</sub> tlpB<sub>284</sub> A</i> | This work           |
| PTS441  | OI3545 <i>amyE5720::tlpB[Q273H][D274E]</i>                      | This work           |
| PTS421  | OI3545 <i>amyE5720::tlpB[K199T][E200Q]</i>                      | This work           |
| PTS464  | OI3545 <i>amyE5720::tlpB[Q273H][D274E][K199T][E200Q]</i>        | This work           |
| PTS373  | OI3545 <i>amyE5720::mcpA[H273Q][E274D]</i>                      | This work           |
| PTS462  | OI3545 <i>amyE5720::mcpA[T199K][Q200E]</i>                      | This work           |
| PTS481  | OI3545 <i>amyE5720::mcpA[H273Q][E274D][T199K][Q200E]</i>        | This work           |
| PTS251  | OI3545 <i>amyE5720::tlpB[D274N]</i>                             | This work           |
| PTS276  | OI3545 <i>amyE5720::mcpA[E274Q]</i>                             | This work           |
| GB041   | OI3545 <i>amyE5720::P<sub>mcpA</sub>::tlpA</i>                  | Unpublished         |

544

545

546

**Table 2.** Plasmids used in this study

| Plasmid      | Description                                                                             | Reference   |
|--------------|-----------------------------------------------------------------------------------------|-------------|
| pJOE8999     | Shuttle vector for Cas9 expression and tracrRNA transcription; Kan <sup>R</sup>         | (39)        |
| pJSpe        | Modified pJOE8999 optimized for Gibson assembly of homology templates; Kan <sup>R</sup> | This work   |
| pPT058       | pJSpe:: <i>mcpB</i> ( <i>mcpB</i> knockout vector)                                      | This work   |
| pPT074       | pJSpe:: <i>tlpB</i> ( <i>tlpB</i> knockout vector)                                      | This work   |
| pPT116       | pJSpe:: <i>mcpA</i> ( <i>mcpA</i> knockout vector)                                      | This work   |
| pPT118       | pJSpe:: <i>tlpA</i> ( <i>tlpA</i> knockout vector)                                      | This work   |
| pPT141       | pJSpe:: <i>mcpA-tlpA</i> ( <i>mcpA-tlpA</i> knockout vector)                            | This work   |
| pAIN750      | <i>B. subtilis amyE</i> integration vector; Amp <sup>R</sup> , Spc <sup>R</sup>         | (17)        |
| pAIN750mcpA  | pAIN750:: <i>mcpA</i>                                                                   | (25)        |
| pAIN750mcpB  | pAIN750:: <i>mcpB</i>                                                                   | (25)        |
| pAIN750mcpC  | pAIN750:: <i>mcpC</i>                                                                   | (17)        |
| pAIN750tlpA  | pAIN750:: <i>tlpA</i>                                                                   | This work   |
| pAIN750tlpB  | pAIN750:: <i>tlpB</i>                                                                   | This work   |
| pAIN750tlpC  | pAIN750:: <i>tlpC</i>                                                                   | This work   |
| pAIN750yfmS  | pAIN750:: <i>yfmS</i>                                                                   | This work   |
| pAIN750yvaQ  | pAIN750:: <i>yvaQ</i>                                                                   | This work   |
| pAIN750hemAT | pAIN750:: <i>hemAT</i>                                                                  | This work   |
| pAIN750yoaH  | pAIN750:: <i>yoaH</i>                                                                   | This work   |
| pPT065       | pAIN750:: <i>tlpB</i> <sub>362</sub> <i>mcpA</i>                                        | This work   |
| pPT063       | pAIN750:: <i>tlpB</i> <sub>284</sub> <i>mcpA</i>                                        | This work   |
| pPT143       | pAIN750:: <i>tlpB</i> <sub>261</sub> <i>mcpA</i>                                        | This work   |
| pPT224       | pAIN750:: <i>tlpB</i> <sub>238</sub> <i>mcpA</i>                                        | This work   |
| pPT234       | pAIN750:: <i>tlpB</i> <sub>180</sub> <i>mcpA</i>                                        | This work   |
| pPT233       | pAIN750:: <i>mcpA</i> <sub>180</sub> <i>tlpB</i> <sub>284</sub> <i>A</i>                | This work   |
| pPT236       | pAIN750:: <i>mcpA</i> <sub>197</sub> <i>tlpB</i> <sub>284</sub> <i>A</i>                | This work   |
| pPT237       | pAIN750:: <i>mcpA</i> <sub>222</sub> <i>tlpB</i> <sub>284</sub> <i>A</i>                | This work   |
| pPT129       | pAIN750:: <i>tlpB</i> [Q273H][D274E]                                                    | This work   |
| pPT162       | pAIN750:: <i>tlpB</i> [K199T][E200Q]                                                    | This work   |
| pPT202       | pAIN750:: <i>tlpB</i> [Q273H][D274E][K199T][E200Q]                                      | This work   |
| pPT196       | pAIN750:: <i>mcpA</i> [H273Q][E274D]                                                    | This work   |
| pPT163       | pAIN750:: <i>mcpA</i> [T199K][Q200E]                                                    | This work   |
| pPT222       | pAIN750:: <i>mcpA</i> [H273Q][E274D][T199K][Q200E]                                      | This work   |
| pPT101       | pAIN750:: <i>tlpB</i> [D274N]                                                           | This work   |
| pPT107       | pAIN750:: <i>mcpA</i> [E274Q]                                                           | This work   |
| pGB045       | pAIN750::P <sub><i>mcpA</i></sub> :: <i>tlpA</i>                                        | Unpublished |

547

548 **FIGURE CAPTIONS**

549 **Figure 1.** *B. subtilis* exhibits bidirectional chemotaxis to pH gradients. **(A)** Response to  
550 increasing and decreasing pH gradients. **(B)** Methylation is necessary for pH taxis.

551

552 **Figure 2.** McpA and TlpA are the principle chemoreceptors involved in the acid  
553 response and McpB and TlpB are the sole chemoreceptors involved in the base  
554 response. **(A)** Response of strains expressing just one chemoreceptor to pH gradients.

555 **Inset:** response of strain over-expressing *tlpA* as its sole chemoreceptor. **(B)** Response  
556 of mutants lacking key receptors to pH gradients. Error bars denote the standard  
557 deviation of three biological replicates performed on three separate days.

558

559 **Figure 3.** Construction of chimeric receptors to determine regions involved in pH  
560 sensing. **(A)** Domain structure of McpA. Extracellular ligand-binding, dCache\_1 domain  
561 (orange), transmembrane transmembrane, TM1 and TM2 (gray), HAMP domain  
562 (yellow), and cytoplasmic domain (green). **(B)** Cartoon structure of McpA. **(C)** Amino-  
563 acid sequence alignment of McpA and TlpB around chimera junction points. The  
564 numbers designate the fusion points between two chemoreceptors, and the local  
565 sequences of the final chimeric chemoreceptors are highlighted in gray.

566

567 **Figure 4.** Response of strains expressing receptor chimeras involving different  
568 fragments of McpA (red) and TlpB (blue) to pH and casamino-acid (CA) gradients. Error  
569 bars denote the standard deviation of three biological replicates performed on three  
570 separate days.

571  
572 **Figure 5.** Identification of critical residues involved in sensing pH. **(A)** Amino-acid  
573 sequence alignment of pH sensing regions spanning residues (195-284) for the four pH  
574 chemoreceptors reveals candidate residues for mutational analysis. Candidate residues  
575 are shown within the green and yellow dashed boxes. Amino-acid sequence for TlpA  
576 are shown in purple because TlpA is sensitive to both acid and base. pH sensing sub-  
577 regions identified from chimeric receptor analysis are highlighted in the orange boxes.  
578 **(B)** Predicted structure of the TlpB ligand binding domain (LBD). Two pH sensing sub-  
579 regions are shown in orange consistent with panel A. The candidate amino-acid  
580 residues on the TlpB extracellular LBD are shown in green and yellow. **(C)** Response of  
581 strains expressing *tlpB* mutants to pH and casamino-acid (CA) gradients. **(D)** Response  
582 of strains expressing *mcpA* mutants to pH and negative indole gradients. Error bars  
583 denote the standard deviation of three biological replicates performed on three separate  
584 days.

585  
586 **Figure 6.** Model for pH sensing mechanism in *B. subtilis*. **(A)** At low pH, two ionizable  
587 residues (solid green circle) on TlpB are in their protonated state and form hydrogen  
588 bonds with two adjacent residues (white circle). Deprotonation of these residues upon  
589 pH increase disrupts the local structure due to decreased hydrogen bonding and  
590 induces signaling. **(B)** At high pH, the key histidine residue (lower white circle) within the  
591 pH sensing region of McpA is in neutral state and forms hydrogen bonds with adjacent  
592 residues (upper white circle). As pH decreases, the histidine residue becomes



593 protonated (solid green circle), leading to loss of hydrogen bonding. This disrupts the  
594 local structure and induces signaling.

595

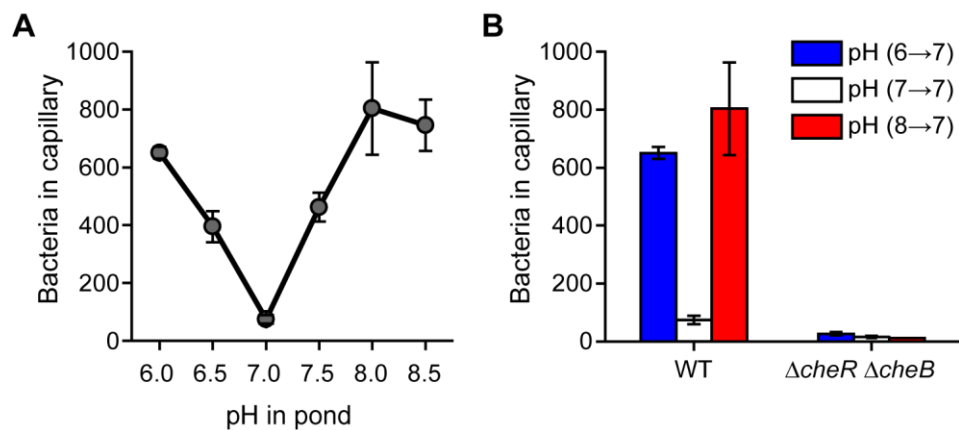

596

597 **Figure 1.** *B. subtilis* exhibits bidirectional chemotaxis to pH gradients. **(A)** Response to

598 increasing and decreasing pH gradients. **(B)** Methylation is necessary for pH taxis.

599

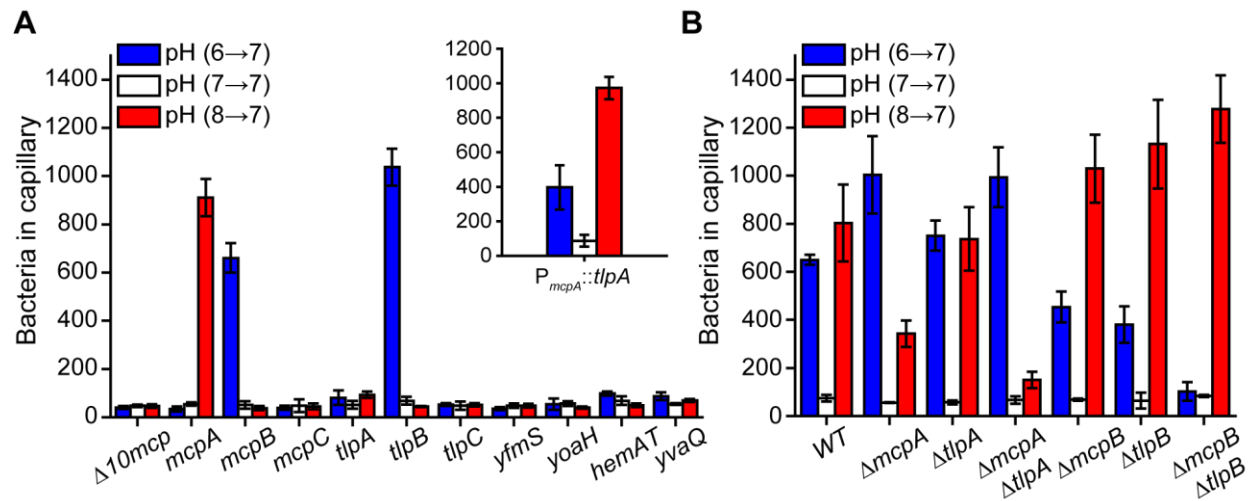

600

601 **Figure 2.** McpA and TlpA are the principle chemoreceptors involved in the acid  
602 response and McpB and TlpB are the sole chemoreceptors involved in the base  
603 response. **(A)** Response of strains expressing just one chemoreceptor to pH gradients.  
604 **Inset:** response of strain over-expressing  $tlpA$  as its sole chemoreceptor. **(B)** Response  
605 of mutants lacking key receptors to pH gradients. Error bars denote the standard  
606 deviation of three biological replicates performed on three separate days.

607

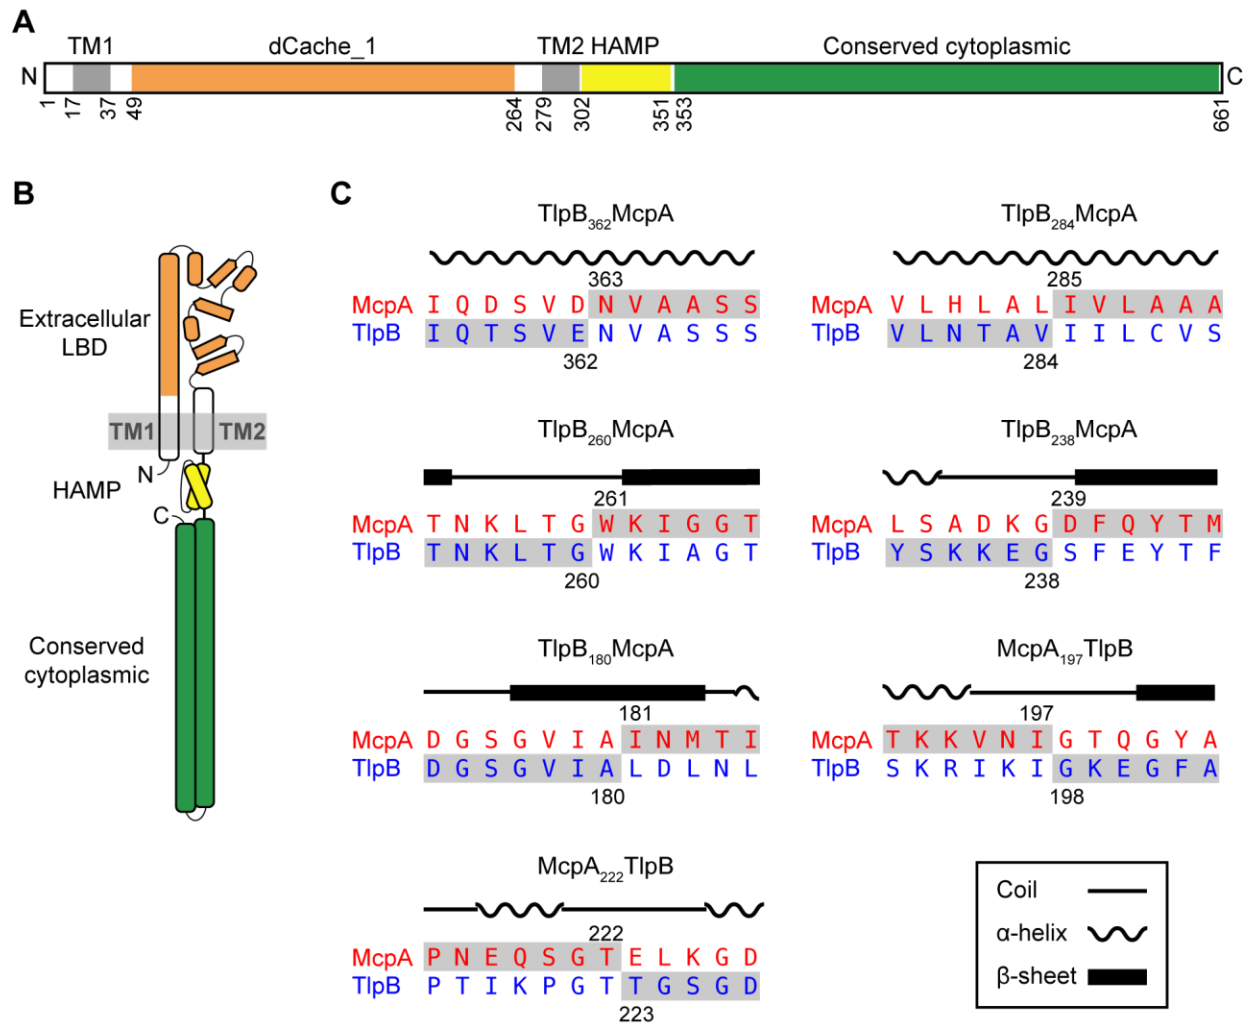

608

609 **Figure 3.** Construction of chimeric receptors to determine regions involved in pH  
 610 sensing. **(A)** Domain structure of McpA. Extracellular ligand-binding, dCache\_1 domain  
 611 (orange), transmembrane transmembrane, TM1 and TM2 (gray), HAMP domain  
 612 (yellow), and cytoplasmic domain (green). **(B)** Cartoon structure of McpA. **(C)** Amino-  
 613 acid sequence alignment of McpA and TlpB around chimera junction points. The  
 614 numbers designate the fusion points between two chemoreceptors, and the local  
 615 sequences of the final chimeric chemoreceptors are highlighted in gray.

616

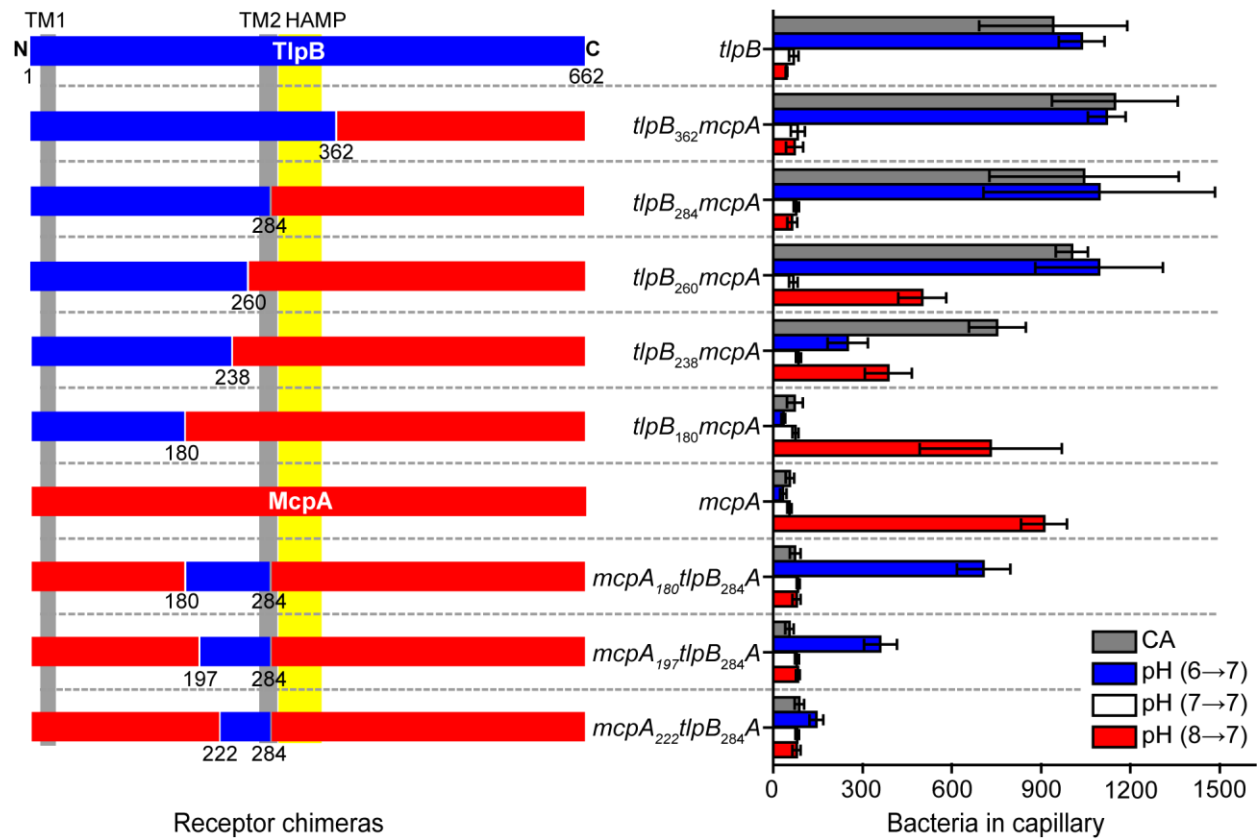

617

Receptor chimeras

618 **Figure 4.** Response of strains expressing receptor chimeras involving different  
 619 fragments of McpA (red) and TlpB (blue) to pH and casamino-acid (CA) gradients. Error  
 620 bars denote the standard deviation of three biological replicates performed on three  
 621 separate days.

622

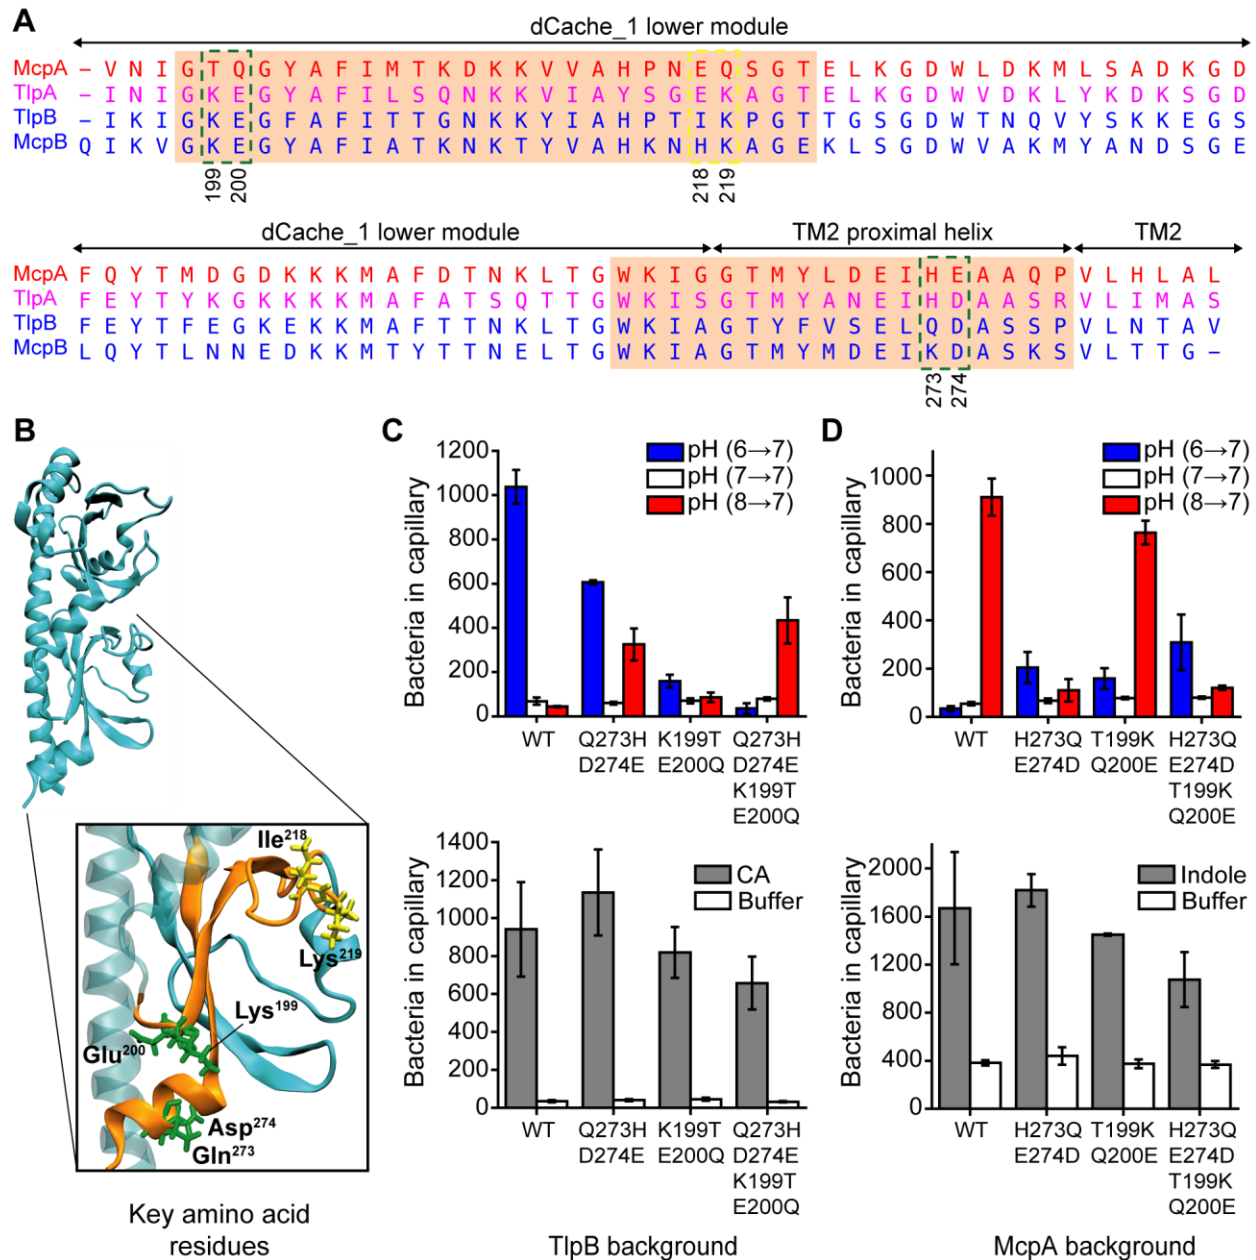

623

624 **Figure 5.** Identification of critical residues involved in sensing pH. **(A)** Amino-acid

625 sequence alignment of pH sensing regions spanning residues (195-284) for the four pH

626 chemoreceptors reveals candidate residues for mutational analysis. Candidate residues

627 are shown within the green and yellow dashed boxes. Amino-acid sequence for TlpA

628 are shown in purple because TlpA is sensitive to both acid and base. pH sensing sub-

629 regions identified from chimeric receptor analysis are highlighted in the orange boxes.

630 **(B)** Predicted structure of the TlpB ligand binding domain (LBD). Two pH sensing sub-  
631 regions are shown in orange consistent with panel A. The candidate amino-acid  
632 residues on the TlpB extracellular LBD are shown in green and yellow. **(C)** Response of  
633 strains expressing *tlpB* mutants to pH and casamino-acid (CA) gradients. **(D)** Response  
634 of strains expressing *mcpA* mutants to pH and negative indole gradients. Error bars  
635 denote the standard deviation of three biological replicates performed on three separate  
636 days.  
637  
638

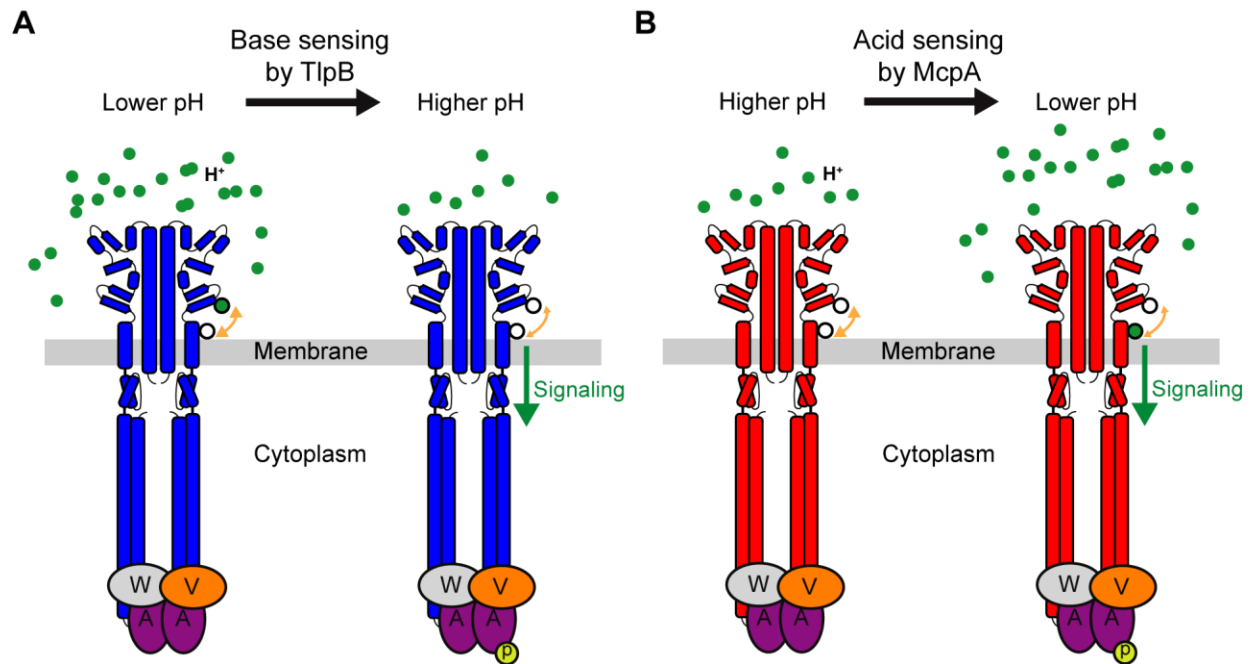

639

640 **Figure 6.** Model for pH sensing mechanism in *B. subtilis*. **(A)** At low pH, two ionizable  
641 residues (solid green circle) on TlpB are in their protonated state and form hydrogen  
642 bonds with two adjacent residues (white circle). Deprotonation of these residues upon  
643 pH increase disrupts the local structure due to decreased hydrogen bonding and  
644 induces signaling. **(B)** At high pH, the key histidine residue (lower white circle) within the  
645 pH sensing region of McpA is in neutral state and forms hydrogen bonds with adjacent  
646 residues (upper white circle). As pH decreases, the histidine residue becomes  
647 protonated (solid green circle), leading to loss of hydrogen bonding. This disrupts the  
648 local structure and induces signaling.

649



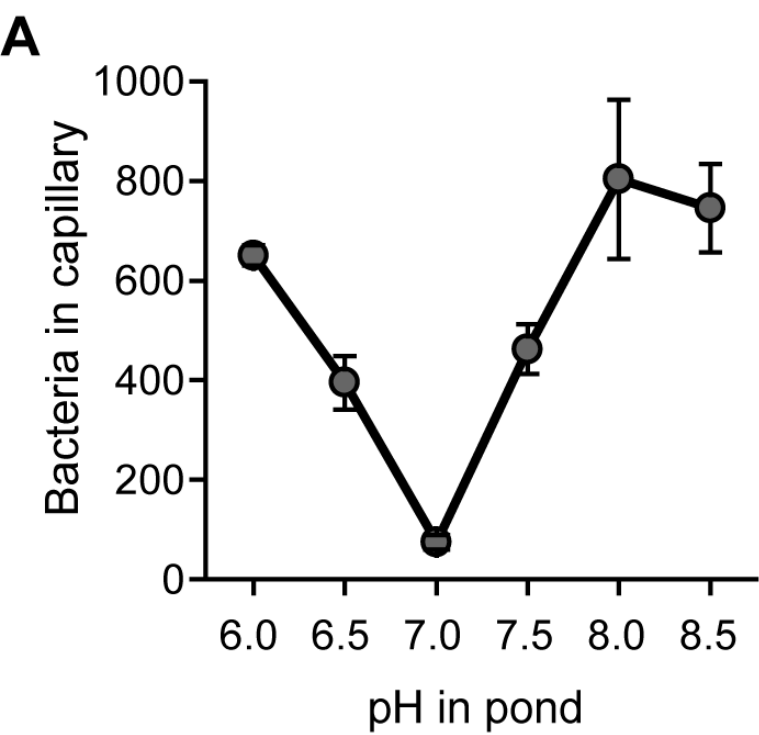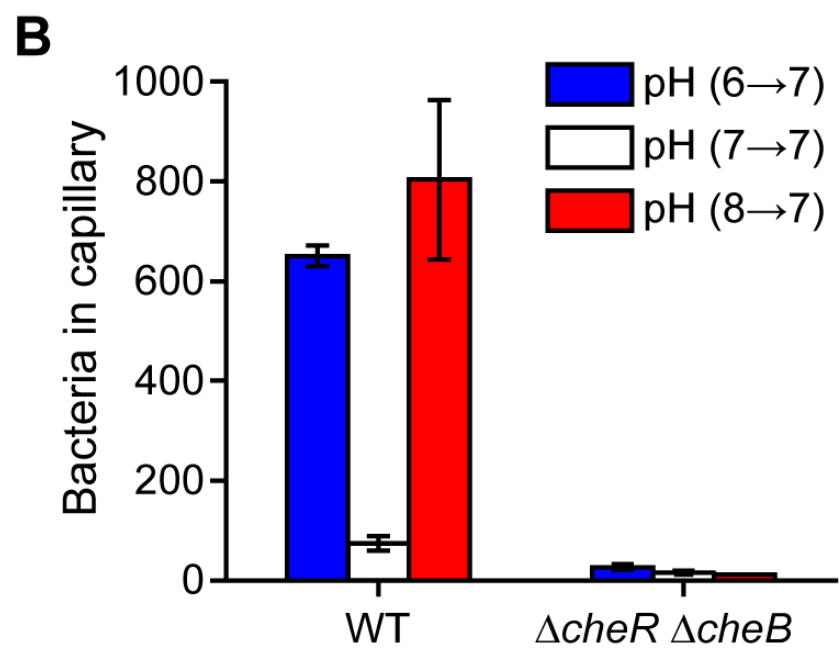

**A**

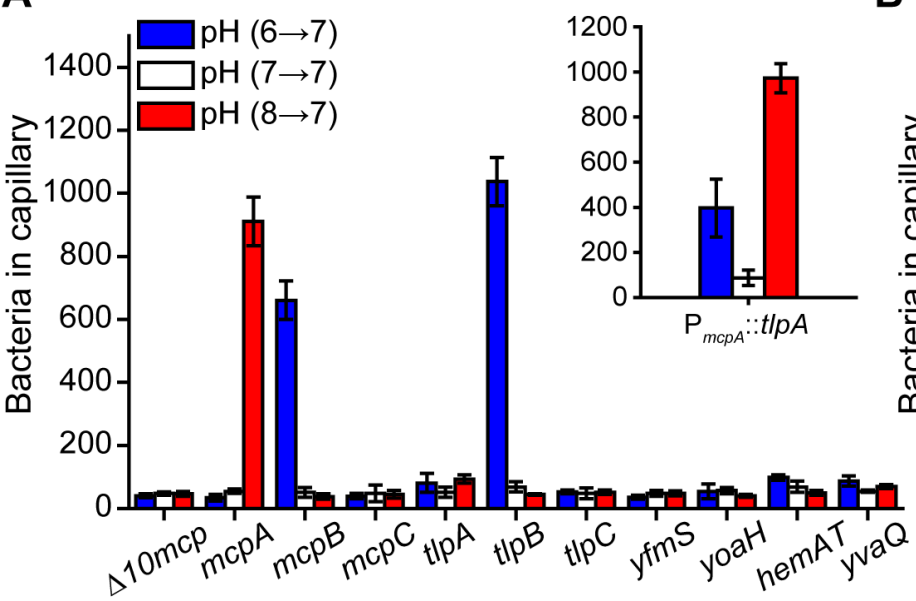

**B**

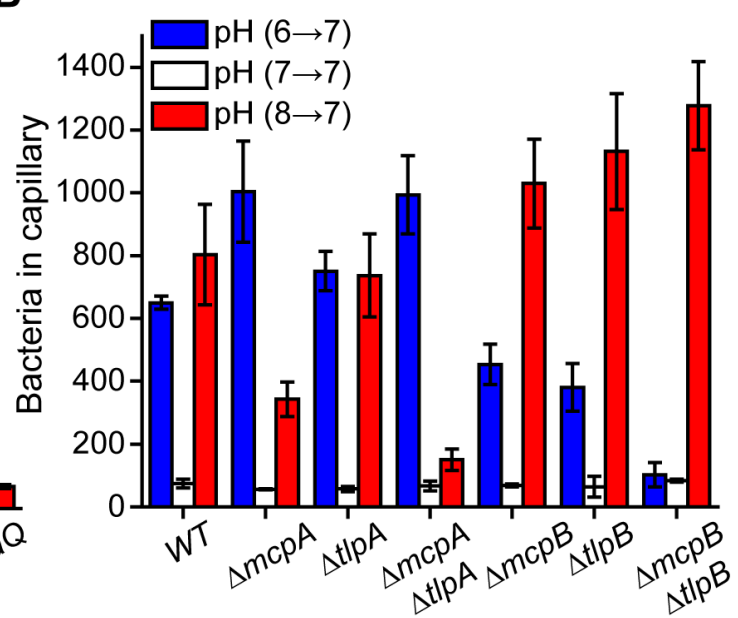

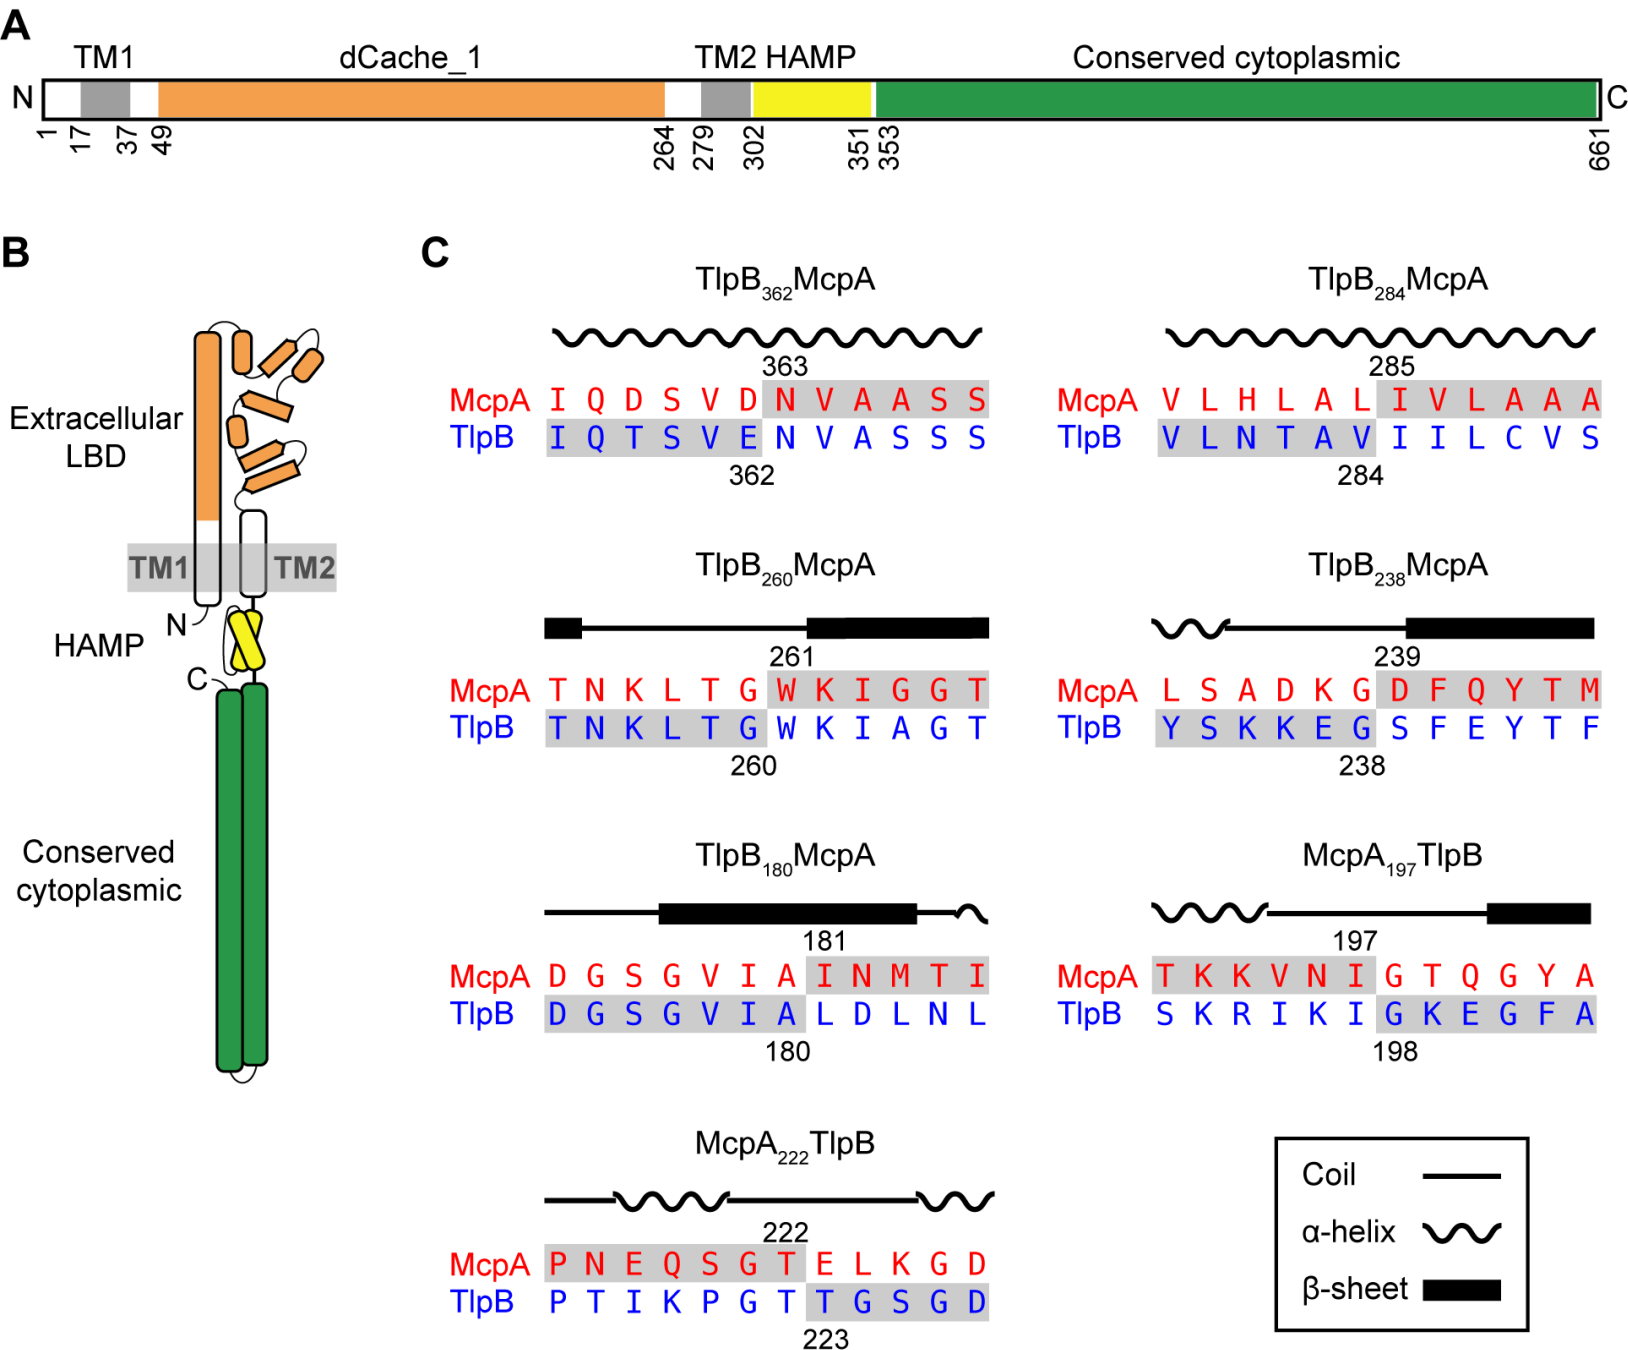

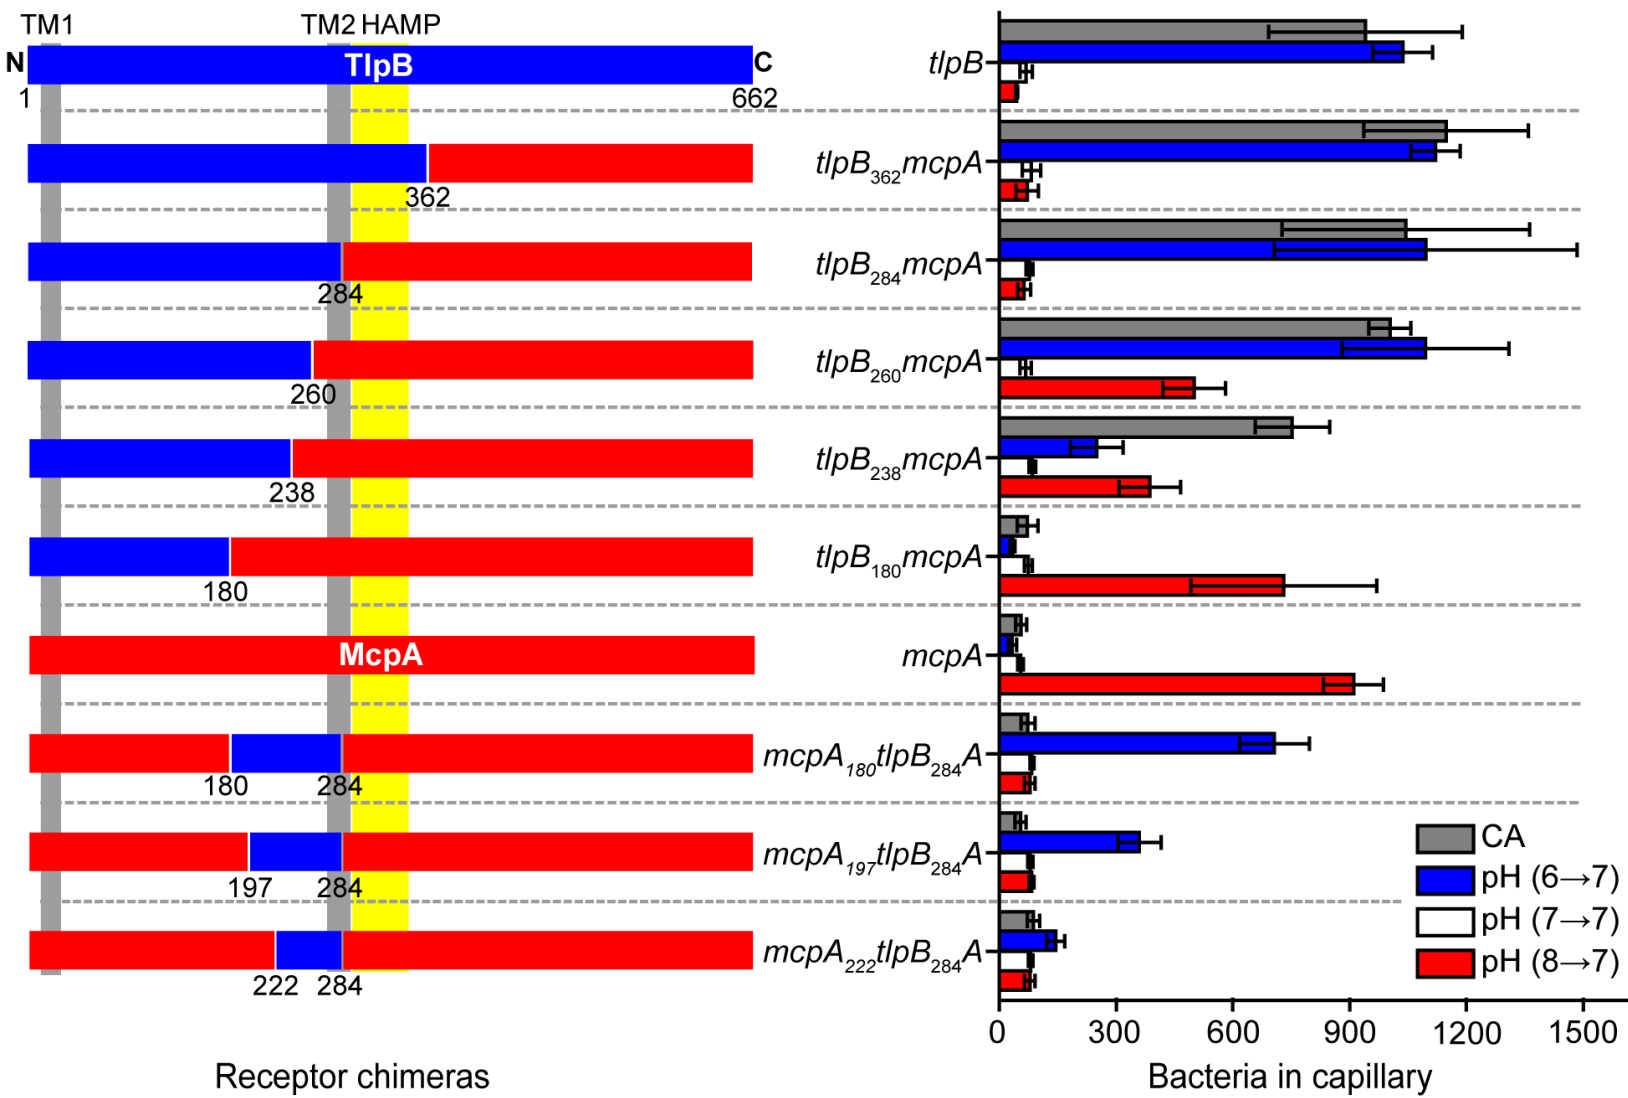

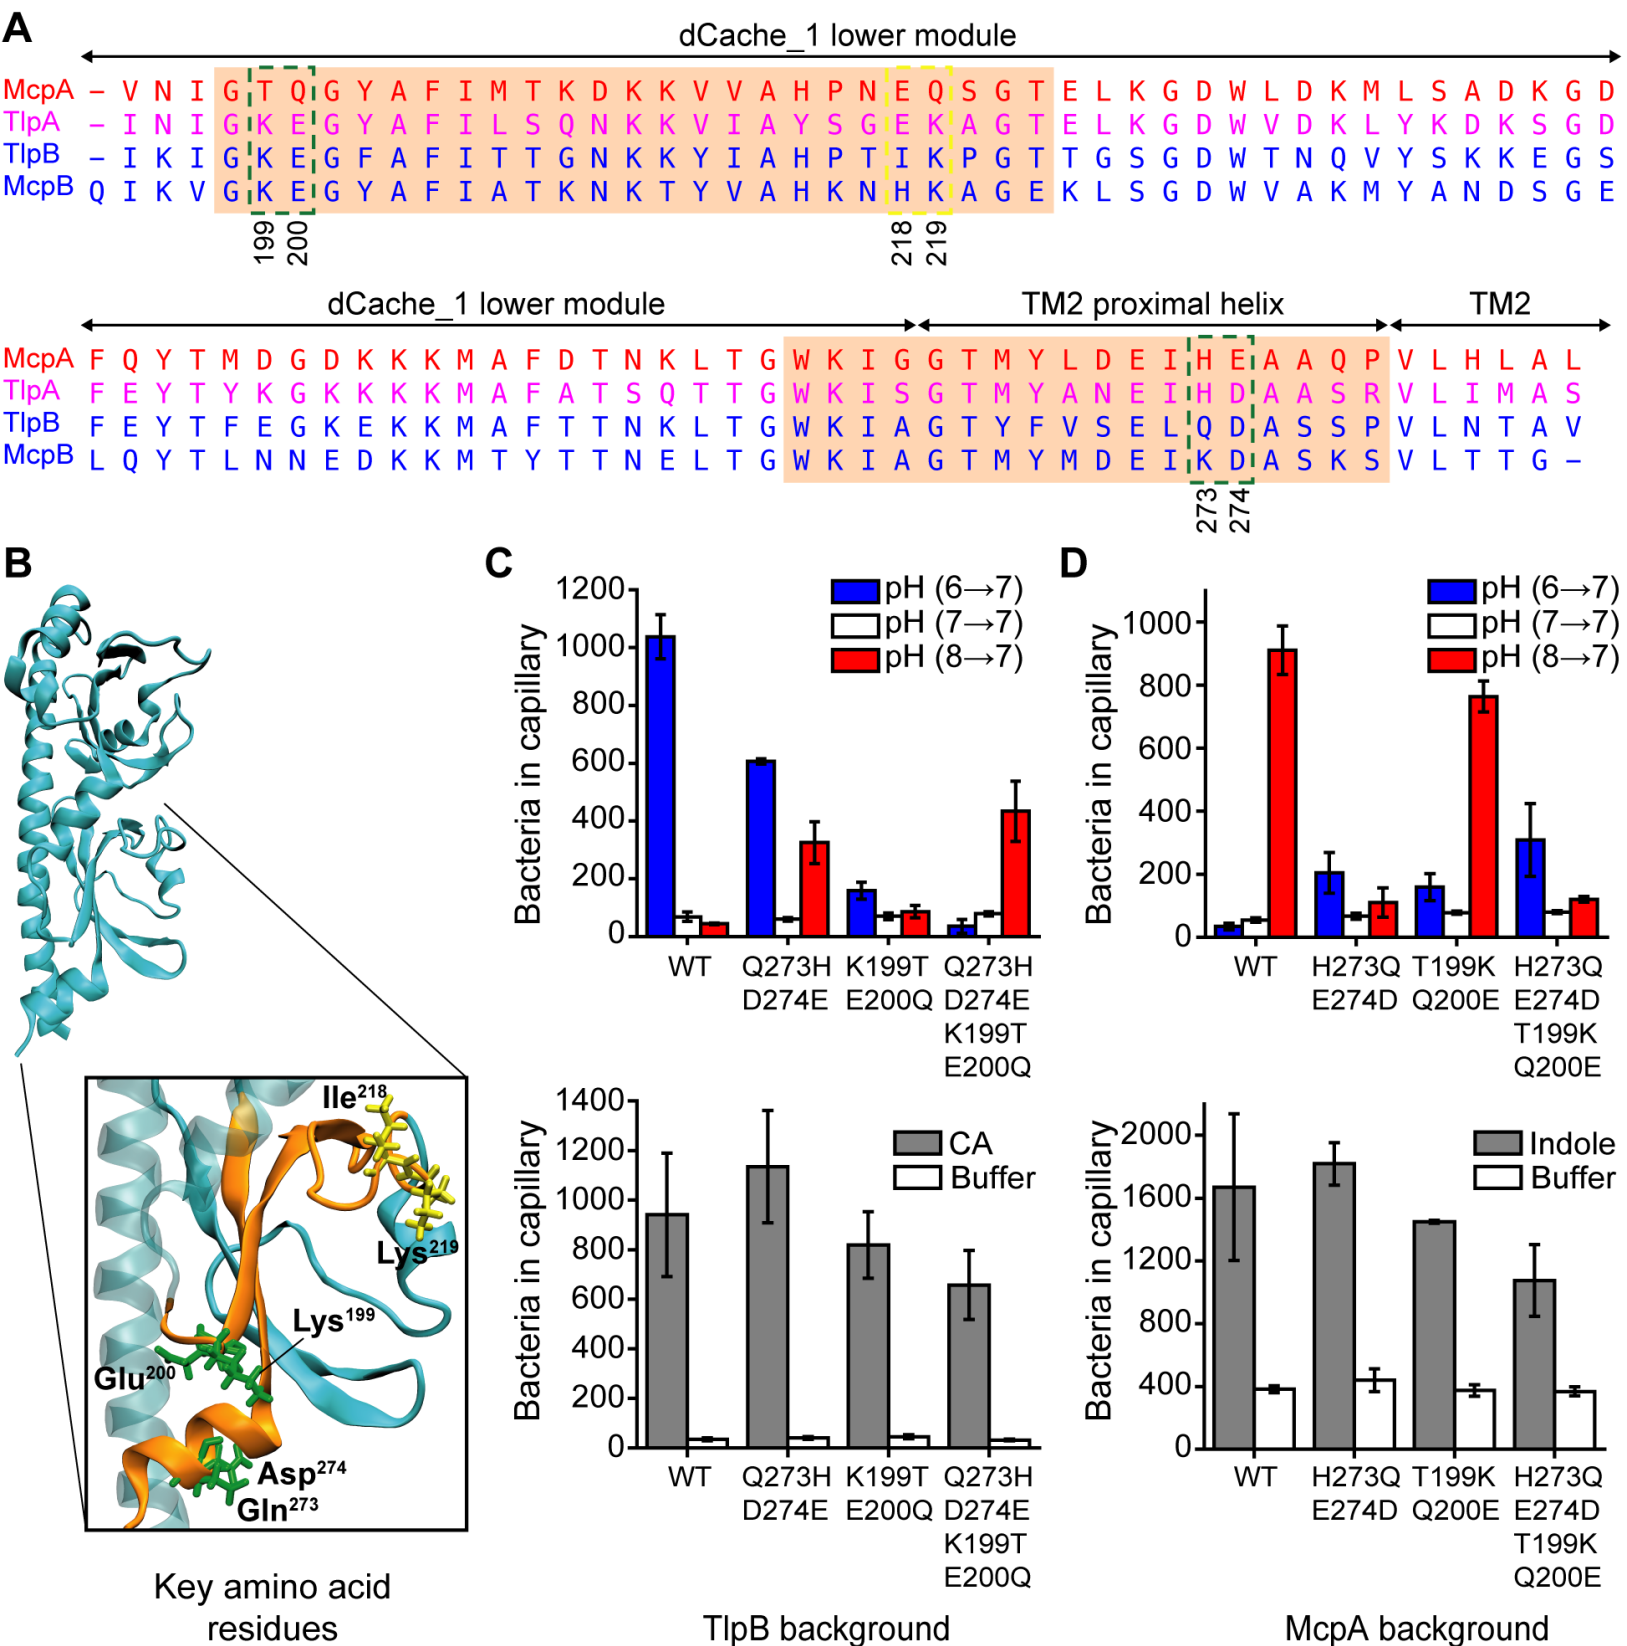

**A**

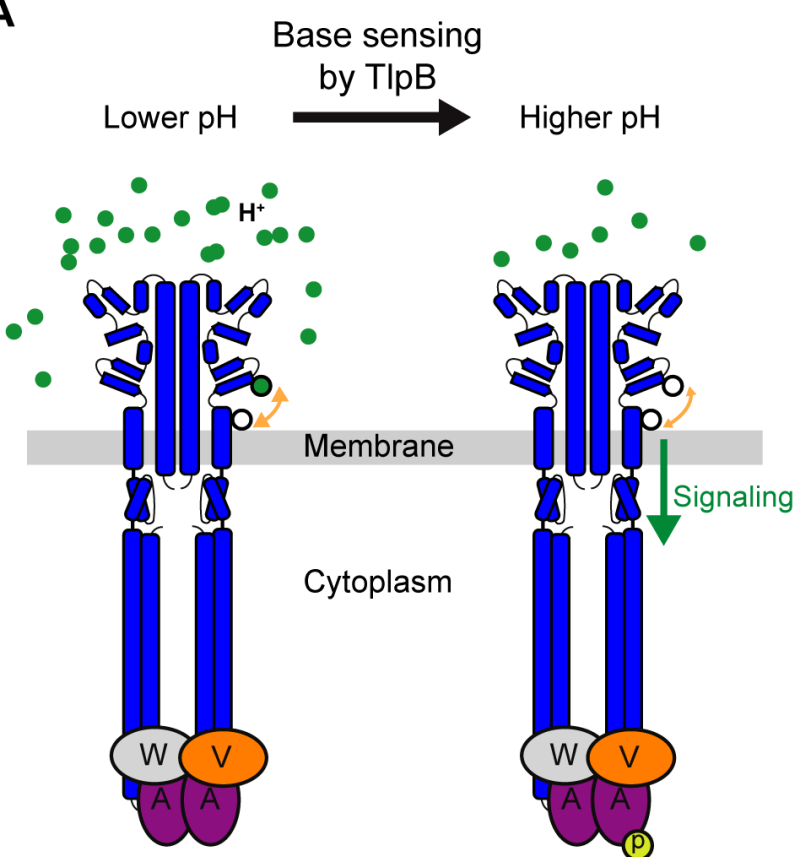

**B**

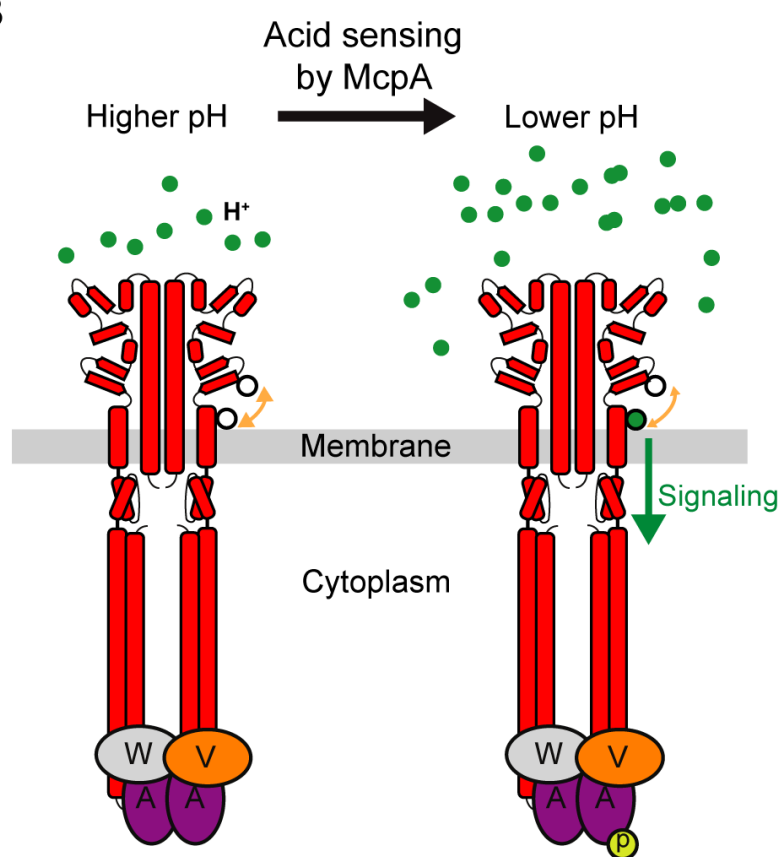

Source: https://www.biorxiv.org/content/10.1101/715946v1.full.pdf
